# Supplementary material for: Dendritic Cell-Associated miRNAs Are Modulated via Chromatin Remodeling in Response to Different Environments
Source: PLoS One. 2014 Apr 3;9(4):e90231. doi: 10.1371/journal.pone.0090231 (PMC3974670; doi:10.1371/journal.pone.0090231)
Supplement: Table S2 — miRNA array of moDC, LPS-conditioned moDCs and TGF-βconditioned moDCs. (XLS) [file pone.0090231.s005.xls]

## Sheet: Origin Data
miRNA name	FC ([lps] vs [ctrl])	Regulation ([lps] vs [ctrl])	FC ([tgfb] vs [ctrl])	Regulation ([tgfb] vs [ctrl])	ctrl.ProbeSignal(normalized)	lps.ProbeSignal(normalized)	tgfb.ProbeSignal(normalized)	ctrl.singal	lps.singal	tgfb.singal
hsa-let-7a-3p	-1.05907	down	1.16238	up	-3.23912	-3.32192	-3.02204	Not Detected	Not Detected	Not Detected
hsa-let-7a-5p	1.13421	up	-1.21726	down	9.25431	9.436	8.97068	Detected	Detected	Detected
hsa-let-7b-3p	-1.05907	down	1.16238	up	-3.23912	-3.32192	-3.02204	Not Detected	Not Detected	Not Detected
hsa-let-7b-5p	-1.04366	down	-1.09501	down	7.69156	7.62991	7.56062	Detected	Detected	Detected
hsa-let-7c	1.24618	up	-1.30796	down	4.56844	4.88596	4.18113	Detected	Detected	Detected
hsa-let-7d-3p	-1.05907	down	1.16238	up	-3.23912	-3.32192	-3.02204	Not Detected	Not Detected	Not Detected
hsa-let-7d-5p	1.03179	up	-1.14468	down	6.92663	6.97179	6.73169	Detected	Detected	Detected
hsa-let-7e-3p	-1.05907	down	1.16238	up	-3.23912	-3.32192	-3.02204	Not Detected	Not Detected	Not Detected
hsa-let-7e-5p	1.10931	up	-1.26963	down	5.7189	5.86856	5.37449	Detected	Detected	Detected
hsa-let-7f-5p	1.1722	up	-1.12874	down	9.09206	9.32127	8.91735	Detected	Detected	Detected
hsa-let-7g-3p	-1.05907	down	1.16238	up	-3.23912	-3.32192	-3.02204	Not Detected	Not Detected	Not Detected
hsa-let-7g-5p	1.21568	up	-1.65114	down	10.5854	10.8672	9.86194	Detected	Detected	Detected
hsa-let-7i-3p	-1.05907	down	1.16238	up	-3.23912	-3.32192	-3.02204	Not Detected	Not Detected	Not Detected
hsa-let-7i-5p	-1.03526	down	-1.29253	down	8.91735	8.86736	8.54715	Detected	Detected	Detected
hsa-mir-1	-1.05907	down	1.16238	up	-3.23912	-3.32192	-3.02204	Not Detected	Not Detected	Not Detected
hsa-mir-100-3p	-1.05907	down	1.16238	up	-3.23912	-3.32192	-3.02204	Not Detected	Not Detected	Not Detected
hsa-mir-100-5p	3.00685	up	1.16238	up	-3.23912	-1.65086	-3.02204	Not Detected	Detected	Not Detected
hsa-mir-101-3p	1.46273	up	-1.1954	down	5.9201	6.46877	5.66261	Detected	Detected	Detected
hsa-mir-101-5p	-1.05907	down	1.16238	up	-3.23912	-3.32192	-3.02204	Not Detected	Not Detected	Not Detected
hsa-miR-103a-2-5p	-1.05907	down	1.16238	up	-3.23912	-3.32192	-3.02204	Not Detected	Not Detected	Not Detected
hsa-miR-103a-3p	-1.01557	down	-1.47259	down	7.5829	7.56062	7.02455	Detected	Detected	Detected
hsa-miR-103b	-1.05907	down	1.16238	up	-3.23912	-3.32192	-3.02204	Not Detected	Not Detected	Not Detected
hsa-mir-105-3p	-1.05907	down	1.16238	up	-3.23912	-3.32192	-3.02204	Not Detected	Not Detected	Not Detected
hsa-mir-105-5p	-1.05907	down	1.16238	up	-3.23912	-3.32192	-3.02204	Not Detected	Not Detected	Not Detected
hsa-mir-106a-3p	-1.05907	down	1.16238	up	-3.23912	-3.32192	-3.02204	Not Detected	Not Detected	Not Detected
hsa-mir-106b-3p	-1.05907	down	1.16238	up	-3.23912	-3.32192	-3.02204	Not Detected	Not Detected	Not Detected
hsa-mir-106b-5p	1.25567	up	-1.28852	down	6.86821	7.19667	6.50249	Detected	Detected	Detected
hsa-mir-107	1.06476	up	-1.32318	down	7.02455	7.11507	6.62054	Detected	Detected	Detected
hsa-mir-10a-3p	-1.05907	down	1.16238	up	-3.23912	-3.32192	-3.02204	Not Detected	Not Detected	Not Detected
hsa-mir-10a-5p	1.30761	up	-11.4823	down	0.499302	0.886232	-3.02204	Detected	Detected	Not Detected
hsa-mir-10b-3p	-1.05907	down	1.16238	up	-3.23912	-3.32192	-3.02204	Not Detected	Not Detected	Not Detected
hsa-mir-10b-5p	-1.05907	down	1.16238	up	-3.23912	-3.32192	-3.02204	Not Detected	Not Detected	Not Detected
hsa-mir-1178-3p	-1.05907	down	1.16238	up	-3.23912	-3.32192	-3.02204	Not Detected	Not Detected	Not Detected
hsa-mir-1178-5p	-1.05907	down	1.16238	up	-3.23912	-3.32192	-3.02204	Not Detected	Not Detected	Not Detected
hsa-mir-1179	-1.05907	down	1.16238	up	-3.23912	-3.32192	-3.02204	Not Detected	Not Detected	Not Detected
hsa-mir-1180	3.22714	up	1.16238	up	-3.23912	-1.54886	-3.02204	Not Detected	Detected	Not Detected
hsa-mir-1181	11.8759	up	1.16238	up	-3.23912	0.330843	-3.02204	Not Detected	Detected	Not Detected
hsa-mir-1182	-1.05907	down	1.16238	up	-3.23912	-3.32192	-3.02204	Not Detected	Not Detected	Not Detected
hsa-mir-1183	-1.05907	down	1.16238	up	-3.23912	-3.32192	-3.02204	Not Detected	Not Detected	Not Detected
hsa-mir-1184	-1.05907	down	1.16238	up	-3.23912	-3.32192	-3.02204	Not Detected	Not Detected	Not Detected
hsa-mir-1185-5p	-1.05907	down	1.16238	up	-3.23912	-3.32192	-3.02204	Not Detected	Not Detected	Not Detected
hsa-mir-1197	-1.05907	down	1.16238	up	-3.23912	-3.32192	-3.02204	Not Detected	Not Detected	Not Detected
hsa-mir-1200	-1.05907	down	1.16238	up	-3.23912	-3.32192	-3.02204	Not Detected	Not Detected	Not Detected
hsa-mir-1202	1.06157	up	-1.2547	down	4.97802	5.06422	4.65067	Detected	Detected	Detected
hsa-mir-1203	-1.05907	down	1.16238	up	-3.23912	-3.32192	-3.02204	Not Detected	Not Detected	Not Detected
hsa-mir-1204	-1.05907	down	1.16238	up	-3.23912	-3.32192	-3.02204	Not Detected	Not Detected	Not Detected
hsa-mir-1205	-1.05907	down	1.16238	up	-3.23912	-3.32192	-3.02204	Not Detected	Not Detected	Not Detected
hsa-mir-1206	-1.05907	down	1.16238	up	-3.23912	-3.32192	-3.02204	Not Detected	Not Detected	Not Detected
hsa-mir-1207-3p	-1.05907	down	1.16238	up	-3.23912	-3.32192	-3.02204	Not Detected	Not Detected	Not Detected
hsa-mir-1207-5p	1.07499	up	1.07499	up	4.82334	4.92767	4.92767	Detected	Detected	Detected
hsa-mir-1208	-1.05907	down	1.16238	up	-3.23912	-3.32192	-3.02204	Not Detected	Not Detected	Not Detected
hsa-mir-122-3p	-1.05907	down	1.16238	up	-3.23912	-3.32192	-3.02204	Not Detected	Not Detected	Not Detected
hsa-mir-1224-3p	-1.05907	down	1.16238	up	-3.23912	-3.32192	-3.02204	Not Detected	Not Detected	Not Detected
hsa-mir-1224-5p	-1.05907	down	1.16238	up	-3.23912	-3.32192	-3.02204	Not Detected	Not Detected	Not Detected
hsa-mir-1225-3p	-1.05907	down	1.16238	up	-3.23912	-3.32192	-3.02204	Not Detected	Not Detected	Not Detected
hsa-mir-1225-5p	1.05216	up	1.06515	up	5.45116	5.52451	5.54221	Detected	Detected	Detected
hsa-mir-122-5p	-1.05907	down	1.16238	up	-3.23912	-3.32192	-3.02204	Not Detected	Not Detected	Not Detected
hsa-mir-1226-3p	-1.05907	down	1.16238	up	-3.23912	-3.32192	-3.02204	Not Detected	Not Detected	Not Detected
hsa-mir-1226-5p	-1.05907	down	1.16238	up	-3.23912	-3.32192	-3.02204	Not Detected	Not Detected	Not Detected
hsa-mir-1227-3p	-1.05907	down	1.16238	up	-3.23912	-3.32192	-3.02204	Not Detected	Not Detected	Not Detected
hsa-mir-1227-5p	-1.05907	down	1.16238	up	-3.23912	-3.32192	-3.02204	Not Detected	Not Detected	Not Detected
hsa-mir-1228-3p	-1.75492	down	3.70196	up	0.771251	-0.0401574	2.65954	Detected	Detected	Detected
hsa-mir-1228-5p	3.34384	up	1.16238	up	-3.23912	-1.49761	-3.02204	Not Detected	Detected	Not Detected
hsa-mir-1229-3p	-1.05907	down	1.16238	up	-3.23912	-3.32192	-3.02204	Not Detected	Not Detected	Not Detected
hsa-mir-1229-5p	-1.18038	down	1.22046	up	3.63246	3.39321	3.91989	Detected	Detected	Detected
hsa-mir-1231	-1.05907	down	1.16238	up	-3.23912	-3.32192	-3.02204	Not Detected	Not Detected	Not Detected
hsa-mir-1233-1-5p	12.2008	up	1.16238	up	-3.23912	0.369787	-3.02204	Not Detected	Detected	Not Detected
hsa-mir-1234-3p	-3.72519	down	-10.2254	down	0.332053	-1.56526	-3.02204	Detected	Detected	Not Detected
hsa-mir-1234-5p	-1.22493	down	1.37344	up	6.62054	6.32784	7.07833	Detected	Detected	Detected
hsa-mir-1236-3p	-1.05907	down	1.16238	up	-3.23912	-3.32192	-3.02204	Not Detected	Not Detected	Not Detected
hsa-mir-1236-5p	-1.05907	down	1.16238	up	-3.23912	-3.32192	-3.02204	Not Detected	Not Detected	Not Detected
hsa-mir-1237-3p	-1.05907	down	1.16238	up	-3.23912	-3.32192	-3.02204	Not Detected	Not Detected	Not Detected
hsa-mir-1237-5p	-1.05907	down	1.16238	up	-3.23912	-3.32192	-3.02204	Not Detected	Not Detected	Not Detected
hsa-mir-1238-3p	-1.05907	down	1.16238	up	-3.23912	-3.32192	-3.02204	Not Detected	Not Detected	Not Detected
hsa-mir-1238-5p	-1.05907	down	1.16238	up	-3.23912	-3.32192	-3.02204	Not Detected	Not Detected	Not Detected
hsa-mir-1243	-1.05907	down	1.16238	up	-3.23912	-3.32192	-3.02204	Not Detected	Not Detected	Not Detected
hsa-mir-124-3p	-1.05907	down	1.16238	up	-3.23912	-3.32192	-3.02204	Not Detected	Not Detected	Not Detected
hsa-mir-1244	-1.05907	down	1.16238	up	-3.23912	-3.32192	-3.02204	Not Detected	Not Detected	Not Detected
hsa-miR-1245a	-1.05907	down	1.16238	up	-3.23912	-3.32192	-3.02204	Not Detected	Not Detected	Not Detected
hsa-mir-124-5p	-1.05907	down	1.16238	up	-3.23912	-3.32192	-3.02204	Not Detected	Not Detected	Not Detected
hsa-mir-1246	1.04474	up	-1.30672	down	5.85697	5.9201	5.47102	Detected	Detected	Detected
hsa-mir-1247-3p	-1.05907	down	1.16238	up	-3.23912	-3.32192	-3.02204	Not Detected	Not Detected	Not Detected
hsa-mir-1247-5p	-1.05907	down	1.16238	up	-3.23912	-3.32192	-3.02204	Not Detected	Not Detected	Not Detected
hsa-mir-1248	-1.05907	down	1.16238	up	-3.23912	-3.32192	-3.02204	Not Detected	Not Detected	Not Detected
hsa-mir-1249	-1.05907	down	1.16238	up	-3.23912	-3.32192	-3.02204	Not Detected	Not Detected	Not Detected
hsa-mir-1250	-1.05907	down	1.16238	up	-3.23912	-3.32192	-3.02204	Not Detected	Not Detected	Not Detected
hsa-mir-1251	-1.05907	down	1.16238	up	-3.23912	-3.32192	-3.02204	Not Detected	Not Detected	Not Detected
hsa-mir-1252	-1.05907	down	1.16238	up	-3.23912	-3.32192	-3.02204	Not Detected	Not Detected	Not Detected
hsa-mir-1253	-1.05907	down	1.16238	up	-3.23912	-3.32192	-3.02204	Not Detected	Not Detected	Not Detected
hsa-mir-1254	-1.05907	down	1.16238	up	-3.23912	-3.32192	-3.02204	Not Detected	Not Detected	Not Detected
hsa-mir-1255a	-1.05907	down	1.16238	up	-3.23912	-3.32192	-3.02204	Not Detected	Not Detected	Not Detected
hsa-mir-1255b-5p	-1.05907	down	1.16238	up	-3.23912	-3.32192	-3.02204	Not Detected	Not Detected	Not Detected
hsa-mir-1256	-1.05907	down	1.16238	up	-3.23912	-3.32192	-3.02204	Not Detected	Not Detected	Not Detected
hsa-mir-1257	-1.05907	down	1.16238	up	-3.23912	-3.32192	-3.02204	Not Detected	Not Detected	Not Detected
hsa-mir-1258	-1.05907	down	1.16238	up	-3.23912	-3.32192	-3.02204	Not Detected	Not Detected	Not Detected
hsa-mir-125a-3p	3.70023	up	1.16238	up	-3.23912	-1.3515	-3.02204	Not Detected	Detected	Not Detected
hsa-mir-125a-5p	-1.35306	down	-1.28792	down	4.50755	4.07133	4.1425	Detected	Detected	Detected
hsa-mir-125b-5p	-1.11492	down	-14.9788	down	0.882813	0.725869	-3.02204	Detected	Detected	Not Detected
hsa-miR-1260a	-1.5861	down	1.12307	up	8.69992	8.03444	8.86736	Detected	Detected	Detected
hsa-mir-1261	-1.05907	down	1.16238	up	-3.23912	-3.32192	-3.02204	Not Detected	Not Detected	Not Detected
hsa-mir-1262	-1.05907	down	1.16238	up	-3.23912	-3.32192	-3.02204	Not Detected	Not Detected	Not Detected
hsa-mir-1263	-1.05907	down	1.16238	up	-3.23912	-3.32192	-3.02204	Not Detected	Not Detected	Not Detected
hsa-mir-126-3p	1.87005	up	-52.6829	down	2.69723	3.6003	-3.02204	Detected	Detected	Not Detected
hsa-mir-1264	-1.05907	down	1.16238	up	-3.23912	-3.32192	-3.02204	Not Detected	Not Detected	Not Detected
hsa-mir-1265	-1.05907	down	1.16238	up	-3.23912	-3.32192	-3.02204	Not Detected	Not Detected	Not Detected
hsa-mir-126-5p	-1.05907	down	1.16238	up	-3.23912	-3.32192	-3.02204	Not Detected	Not Detected	Not Detected
hsa-mir-1266	-1.05907	down	1.16238	up	-3.23912	-3.32192	-3.02204	Not Detected	Not Detected	Not Detected
hsa-mir-1267	-1.05907	down	1.16238	up	-3.23912	-3.32192	-3.02204	Not Detected	Not Detected	Not Detected
hsa-miR-1268a	1.04371	up	-1.00931	down	4.52091	4.58263	4.50755	Detected	Detected	Detected
hsa-miR-1269a	-1.05907	down	1.16238	up	-3.23912	-3.32192	-3.02204	Not Detected	Not Detected	Not Detected
hsa-mir-1270	-1.05907	down	1.16238	up	-3.23912	-3.32192	-3.02204	Not Detected	Not Detected	Not Detected
hsa-mir-1271-3p	-1.05907	down	1.16238	up	-3.23912	-3.32192	-3.02204	Not Detected	Not Detected	Not Detected
hsa-mir-1271-5p	2.95858	up	1.16238	up	-3.23912	-1.67421	-3.02204	Not Detected	Detected	Not Detected
hsa-mir-1272	-1.05907	down	1.16238	up	-3.23912	-3.32192	-3.02204	Not Detected	Not Detected	Not Detected
hsa-mir-1273a	-1.05907	down	1.16238	up	-3.23912	-3.32192	-3.02204	Not Detected	Not Detected	Not Detected
hsa-mir-127-3p	-1.05907	down	1.16238	up	-3.23912	-3.32192	-3.02204	Not Detected	Not Detected	Not Detected
hsa-mir-1275	1.03444	up	-1.40557	down	4.31401	4.36285	3.82285	Detected	Detected	Detected
hsa-mir-127-5p	-1.05907	down	1.16238	up	-3.23912	-3.32192	-3.02204	Not Detected	Not Detected	Not Detected
hsa-mir-1276	-1.05907	down	1.16238	up	-3.23912	-3.32192	-3.02204	Not Detected	Not Detected	Not Detected
hsa-mir-1277-3p	-1.05907	down	1.16238	up	-3.23912	-3.32192	-3.02204	Not Detected	Not Detected	Not Detected
hsa-mir-1278	-1.05907	down	1.16238	up	-3.23912	-3.32192	-3.02204	Not Detected	Not Detected	Not Detected
hsa-mir-1279	-1.05907	down	1.16238	up	-3.23912	-3.32192	-3.02204	Not Detected	Not Detected	Not Detected
hsa-mir-128	1.20154	up	-14.2845	down	0.814345	1.07923	-3.02204	Detected	Detected	Not Detected
hsa-mir-1281	-3.6864	down	7.27714	up	0.190363	-1.69185	3.05374	Detected	Detected	Detected
hsa-mir-1282	-1.05907	down	1.16238	up	-3.23912	-3.32192	-3.02204	Not Detected	Not Detected	Not Detected
hsa-mir-1283	-1.05907	down	1.16238	up	-3.23912	-3.32192	-3.02204	Not Detected	Not Detected	Not Detected
hsa-mir-1284	-1.05907	down	1.16238	up	-3.23912	-3.32192	-3.02204	Not Detected	Not Detected	Not Detected
hsa-mir-1285-3p	-1.05907	down	1.16238	up	-3.23912	-3.32192	-3.02204	Not Detected	Not Detected	Not Detected
hsa-mir-1285-5p	-1.05907	down	1.16238	up	-3.23912	-3.32192	-3.02204	Not Detected	Not Detected	Not Detected
hsa-mir-1286	-1.05907	down	1.16238	up	-3.23912	-3.32192	-3.02204	Not Detected	Not Detected	Not Detected
hsa-mir-1287	-1.05907	down	1.16238	up	-3.23912	-3.32192	-3.02204	Not Detected	Not Detected	Not Detected
hsa-mir-1288	-1.05907	down	1.16238	up	-3.23912	-3.32192	-3.02204	Not Detected	Not Detected	Not Detected
hsa-mir-1289	-1.05907	down	1.16238	up	-3.23912	-3.32192	-3.02204	Not Detected	Not Detected	Not Detected
hsa-mir-1290	-1	down	-1.00702	down	2.74368	2.74368	2.73359	Detected	Detected	Detected
hsa-mir-1291	-1.05907	down	1.16238	up	-3.23912	-3.32192	-3.02204	Not Detected	Not Detected	Not Detected
hsa-mir-1292-3p	-1.05907	down	1.16238	up	-3.23912	-3.32192	-3.02204	Not Detected	Not Detected	Not Detected
hsa-mir-1292-5p	-1.05907	down	1.16238	up	-3.23912	-3.32192	-3.02204	Not Detected	Not Detected	Not Detected
hsa-mir-1293	-1.05907	down	1.16238	up	-3.23912	-3.32192	-3.02204	Not Detected	Not Detected	Not Detected
hsa-mir-1294	-1.05907	down	1.16238	up	-3.23912	-3.32192	-3.02204	Not Detected	Not Detected	Not Detected
hsa-mir-1295a	-1.05907	down	1.16238	up	-3.23912	-3.32192	-3.02204	Not Detected	Not Detected	Not Detected
hsa-mir-129-5p	-1.05907	down	1.16238	up	-3.23912	-3.32192	-3.02204	Not Detected	Not Detected	Not Detected
hsa-mir-1296	-1.05907	down	1.16238	up	-3.23912	-3.32192	-3.02204	Not Detected	Not Detected	Not Detected
hsa-mir-1297	-1.05907	down	1.16238	up	-3.23912	-3.32192	-3.02204	Not Detected	Not Detected	Not Detected
hsa-mir-1298	-1.05907	down	1.16238	up	-3.23912	-3.32192	-3.02204	Not Detected	Not Detected	Not Detected
hsa-mir-1299	-1.05907	down	1.16238	up	-3.23912	-3.32192	-3.02204	Not Detected	Not Detected	Not Detected
hsa-mir-1301	-1.05907	down	1.16238	up	-3.23912	-3.32192	-3.02204	Not Detected	Not Detected	Not Detected
hsa-mir-1302	-1.05907	down	1.16238	up	-3.23912	-3.32192	-3.02204	Not Detected	Not Detected	Not Detected
hsa-mir-1303	-1.05907	down	1.16238	up	-3.23912	-3.32192	-3.02204	Not Detected	Not Detected	Not Detected
hsa-mir-1304-3p	-1.05907	down	1.16238	up	-3.23912	-3.32192	-3.02204	Not Detected	Not Detected	Not Detected
hsa-mir-1304-5p	-1.05907	down	1.16238	up	-3.23912	-3.32192	-3.02204	Not Detected	Not Detected	Not Detected
hsa-mir-1305	-2.85358	down	-52.1156	down	2.68161	1.16884	-3.02204	Detected	Detected	Not Detected
hsa-mir-1306-3p	10.4013	up	1.16238	up	-3.23912	0.139581	-3.02204	Not Detected	Detected	Not Detected
hsa-mir-1306-5p	-1.05907	down	1.16238	up	-3.23912	-3.32192	-3.02204	Not Detected	Not Detected	Not Detected
hsa-mir-1307-3p	-1.05907	down	1.16238	up	-3.23912	-3.32192	-3.02204	Not Detected	Not Detected	Not Detected
hsa-mir-1307-5p	-1.05907	down	1.16238	up	-3.23912	-3.32192	-3.02204	Not Detected	Not Detected	Not Detected
hsa-mir-130a-3p	1.42749	up	-80.5275	down	3.30937	3.82285	-3.02204	Detected	Detected	Not Detected
hsa-mir-130a-5p	-1.05907	down	1.16238	up	-3.23912	-3.32192	-3.02204	Not Detected	Not Detected	Not Detected
hsa-mir-130b-3p	1.19442	up	-88.8226	down	3.45082	3.70713	-3.02204	Detected	Detected	Not Detected
hsa-mir-130b-5p	-1.05907	down	1.16238	up	-3.23912	-3.32192	-3.02204	Not Detected	Not Detected	Not Detected
hsa-mir-1321	-1.05907	down	1.16238	up	-3.23912	-3.32192	-3.02204	Not Detected	Not Detected	Not Detected
hsa-mir-1322	-1.05907	down	1.16238	up	-3.23912	-3.32192	-3.02204	Not Detected	Not Detected	Not Detected
hsa-mir-1323	-1.05907	down	1.16238	up	-3.23912	-3.32192	-3.02204	Not Detected	Not Detected	Not Detected
hsa-mir-132-3p	1.09884	up	-2.14656	down	4.4114	4.54739	3.30937	Detected	Detected	Detected
hsa-mir-1324	-1.05907	down	1.16238	up	-3.23912	-3.32192	-3.02204	Not Detected	Not Detected	Not Detected
hsa-mir-132-5p	-3.27745	down	-10.4209	down	0.359369	-1.35321	-3.02204	Detected	Detected	Not Detected
hsa-mir-133a	-1.05907	down	1.16238	up	-3.23912	-3.32192	-3.02204	Not Detected	Not Detected	Not Detected
hsa-mir-133b	-1.05907	down	1.16238	up	-3.23912	-3.32192	-3.02204	Not Detected	Not Detected	Not Detected
hsa-mir-134	11.0926	up	1.16238	up	-3.23912	0.232409	-3.02204	Not Detected	Detected	Not Detected
hsa-mir-135a-3p	-2.72811	down	-7.90014	down	-0.0401574	-1.48806	-3.02204	Detected	Detected	Not Detected
hsa-mir-135a-5p	-1.05907	down	1.16238	up	-3.23912	-3.32192	-3.02204	Not Detected	Not Detected	Not Detected
hsa-mir-135b-3p	-1.05907	down	1.16238	up	-3.23912	-3.32192	-3.02204	Not Detected	Not Detected	Not Detected
hsa-mir-135b-5p	-1.05907	down	1.16238	up	-3.23912	-3.32192	-3.02204	Not Detected	Not Detected	Not Detected
hsa-mir-136-3p	-1.05907	down	1.16238	up	-3.23912	-3.32192	-3.02204	Not Detected	Not Detected	Not Detected
hsa-mir-136-5p	-1.05907	down	1.16238	up	-3.23912	-3.32192	-3.02204	Not Detected	Not Detected	Not Detected
hsa-mir-137	-1.05907	down	1.16238	up	-3.23912	-3.32192	-3.02204	Not Detected	Not Detected	Not Detected
hsa-mir-138-5p	-1.05907	down	1.16238	up	-3.23912	-3.32192	-3.02204	Not Detected	Not Detected	Not Detected
hsa-mir-139-3p	-1.05907	down	1.16238	up	-3.23912	-3.32192	-3.02204	Not Detected	Not Detected	Not Detected
hsa-mir-139-5p	-1.05907	down	1.16238	up	-3.23912	-3.32192	-3.02204	Not Detected	Not Detected	Not Detected
hsa-mir-140-3p	1.08862	up	-1.80714	down	5.96321	6.08572	5.1095	Detected	Detected	Detected
hsa-mir-140-5p	1.27581	up	1.1454	up	5.88987	6.24128	6.08572	Detected	Detected	Detected
hsa-mir-141-3p	-2.8038	down	-8.94832	down	0.139581	-1.3478	-3.02204	Detected	Detected	Not Detected
hsa-mir-141-5p	-1.05907	down	1.16238	up	-3.23912	-3.32192	-3.02204	Not Detected	Not Detected	Not Detected
hsa-mir-142-3p	2.39794	up	1.22102	up	10.9626	12.2244	11.2507	Detected	Detected	Detected
hsa-mir-142-5p	1.62512	up	1.4601	up	7.21111	7.91166	7.75718	Detected	Detected	Detected
hsa-mir-143-3p	-1.05907	down	1.16238	up	-3.23912	-3.32192	-3.02204	Not Detected	Not Detected	Not Detected
hsa-mir-143-5p	-1.05907	down	1.16238	up	-3.23912	-3.32192	-3.02204	Not Detected	Not Detected	Not Detected
hsa-mir-144-3p	64.8643	up	1.16238	up	-3.23912	2.78024	-3.02204	Not Detected	Detected	Not Detected
hsa-mir-144-5p	3.20934	up	1.16238	up	-3.23912	-1.55684	-3.02204	Not Detected	Detected	Not Detected
hsa-mir-145-3p	-1.05907	down	1.16238	up	-3.23912	-3.32192	-3.02204	Not Detected	Not Detected	Not Detected
hsa-mir-145-5p	-1.05907	down	1.16238	up	-3.23912	-3.32192	-3.02204	Not Detected	Not Detected	Not Detected
hsa-mir-1468	-1.05907	down	1.16238	up	-3.23912	-3.32192	-3.02204	Not Detected	Not Detected	Not Detected
hsa-mir-1469	-1.05907	down	1.16238	up	-3.23912	-3.32192	-3.02204	Not Detected	Not Detected	Not Detected
hsa-mir-146a-3p	-1.05907	down	1.16238	up	-3.23912	-3.32192	-3.02204	Not Detected	Not Detected	Not Detected
hsa-mir-146a-5p	1.07665	up	-1.07443	down	6.97179	7.07833	6.86821	Detected	Detected	Detected
hsa-mir-146b-3p	-1.05907	down	1.16238	up	-3.23912	-3.32192	-3.02204	Not Detected	Not Detected	Not Detected
hsa-mir-146b-5p	1.14892	up	-1.09651	down	7.91166	8.11194	7.77874	Detected	Detected	Detected
hsa-mir-1470	-1.05907	down	1.16238	up	-3.23912	-3.32192	-3.02204	Not Detected	Not Detected	Not Detected
hsa-mir-1471	-1.05907	down	1.16238	up	-3.23912	-3.32192	-3.02204	Not Detected	Not Detected	Not Detected
hsa-mir-147a	-1.05907	down	1.16238	up	-3.23912	-3.32192	-3.02204	Not Detected	Not Detected	Not Detected
hsa-mir-147b	-1.05907	down	1.16238	up	-3.23912	-3.32192	-3.02204	Not Detected	Not Detected	Not Detected
hsa-mir-148a-3p	1.35586	up	-2.18865	down	4.29621	4.73542	3.16617	Detected	Detected	Detected
hsa-mir-148a-5p	-1.05907	down	1.16238	up	-3.23912	-3.32192	-3.02204	Not Detected	Not Detected	Not Detected
hsa-mir-148b-3p	-1.00722	down	-17.5802	down	1.11384	1.10346	-3.02204	Detected	Detected	Not Detected
hsa-mir-148b-5p	-1.05907	down	1.16238	up	-3.23912	-3.32192	-3.02204	Not Detected	Not Detected	Not Detected
hsa-mir-149-3p	-1.05907	down	1.16238	up	-3.23912	-3.32192	-3.02204	Not Detected	Not Detected	Not Detected
hsa-mir-149-5p	-1.05907	down	1.16238	up	-3.23912	-3.32192	-3.02204	Not Detected	Not Detected	Not Detected
hsa-mir-150-3p	1.29503	up	-10.5668	down	0.379431	0.752412	-3.02204	Detected	Detected	Not Detected
hsa-mir-150-5p	-1	down	-2.3972	down	11.8468	11.8468	10.5854	Detected	Detected	Detected
hsa-miR-151a-3p	3.38774	up	1.16238	up	-3.23912	-1.47879	-3.02204	Not Detected	Detected	Not Detected
hsa-miR-151a-5p	1.25893	up	-1.65236	down	4.17535	4.50755	3.45082	Detected	Detected	Detected
hsa-mir-152	-1.05907	down	1.16238	up	-3.23912	-3.32192	-3.02204	Not Detected	Not Detected	Not Detected
hsa-mir-153	-1.05907	down	1.16238	up	-3.23912	-3.32192	-3.02204	Not Detected	Not Detected	Not Detected
hsa-mir-1537	-1.05907	down	1.16238	up	-3.23912	-3.32192	-3.02204	Not Detected	Not Detected	Not Detected
hsa-mir-1538	-1.05907	down	1.16238	up	-3.23912	-3.32192	-3.02204	Not Detected	Not Detected	Not Detected
hsa-mir-1539	-1.05907	down	1.16238	up	-3.23912	-3.32192	-3.02204	Not Detected	Not Detected	Not Detected
hsa-mir-154-3p	-1.05907	down	1.16238	up	-3.23912	-3.32192	-3.02204	Not Detected	Not Detected	Not Detected
hsa-mir-154-5p	-1.05907	down	1.16238	up	-3.23912	-3.32192	-3.02204	Not Detected	Not Detected	Not Detected
hsa-mir-155-3p	3.63586	up	1.16238	up	-3.23912	-1.37682	-3.02204	Not Detected	Detected	Not Detected
hsa-mir-155-5p	1.497	up	-1.20584	down	7.19667	7.77874	6.92663	Detected	Detected	Detected
hsa-mir-15a-3p	-1.05907	down	1.16238	up	-3.23912	-3.32192	-3.02204	Not Detected	Not Detected	Not Detected
hsa-mir-15a-5p	1.07987	up	-1.06	down	7.71397	7.82482	7.62991	Detected	Detected	Detected
hsa-mir-15b-3p	-1.05907	down	1.16238	up	-3.23912	-3.32192	-3.02204	Not Detected	Not Detected	Not Detected
hsa-mir-15b-5p	1.26851	up	-1.18496	down	8.35678	8.69992	8.11194	Detected	Detected	Detected
hsa-mir-16-5p	1.36881	up	-1.15541	down	9.52968	9.9826	9.32127	Detected	Detected	Detected
hsa-mir-17-3p	3.29475	up	-17.3656	down	1.09613	2.81629	-3.02204	Detected	Detected	Not Detected
hsa-mir-17-5p	1.07836	up	-1.6046	down	6.57208	6.68092	5.88987	Detected	Detected	Detected
hsa-mir-181a-3p	3.30269	up	1.16238	up	-3.23912	-1.51548	-3.02204	Not Detected	Detected	Not Detected
hsa-mir-181a-5p	1.04942	up	-1.19849	down	6.50249	6.57208	6.24128	Detected	Detected	Detected
hsa-mir-181b-3p	-1.05907	down	1.16238	up	-3.23912	-3.32192	-3.02204	Not Detected	Not Detected	Not Detected
hsa-mir-181b-5p	1.16772	up	-1.70392	down	4.22631	4.45001	3.45745	Detected	Detected	Detected
hsa-mir-181c-3p	3.17442	up	1.16238	up	-3.23912	-1.57262	-3.02204	Not Detected	Detected	Not Detected
hsa-mir-181c-5p	3.07928	up	-17.4541	down	1.10346	2.72605	-3.02204	Detected	Detected	Not Detected
hsa-mir-181d	1.18929	up	-12.0914	down	0.573875	0.823972	-3.02204	Detected	Detected	Not Detected
hsa-mir-182-3p	-1.05907	down	1.16238	up	-3.23912	-3.32192	-3.02204	Not Detected	Not Detected	Not Detected
hsa-mir-1825	-1.05907	down	1.16238	up	-3.23912	-3.32192	-3.02204	Not Detected	Not Detected	Not Detected
hsa-mir-182-5p	-1.05907	down	1.16238	up	-3.23912	-3.32192	-3.02204	Not Detected	Not Detected	Not Detected
hsa-mir-1827	-1.05907	down	1.16238	up	-3.23912	-3.32192	-3.02204	Not Detected	Not Detected	Not Detected
hsa-mir-183-3p	-1.05907	down	1.16238	up	-3.23912	-3.32192	-3.02204	Not Detected	Not Detected	Not Detected
hsa-mir-183-5p	-1.05907	down	1.16238	up	-3.23912	-3.32192	-3.02204	Not Detected	Not Detected	Not Detected
hsa-mir-184	-1.05907	down	1.16238	up	-3.23912	-3.32192	-3.02204	Not Detected	Not Detected	Not Detected
hsa-mir-185-3p	-1.05907	down	1.16238	up	-3.23912	-3.32192	-3.02204	Not Detected	Not Detected	Not Detected
hsa-mir-185-5p	1.03525	up	-1.97878	down	4.09252	4.1425	3.10791	Detected	Detected	Detected
hsa-mir-186-3p	-1.05907	down	1.16238	up	-3.23912	-3.32192	-3.02204	Not Detected	Not Detected	Not Detected
hsa-mir-186-5p	1.19113	up	-1.06204	down	4.39834	4.65067	4.3115	Detected	Detected	Detected
hsa-mir-187-3p	-1.05907	down	1.16238	up	-3.23912	-3.32192	-3.02204	Not Detected	Not Detected	Not Detected
hsa-mir-187-5p	-1.05907	down	1.16238	up	-3.23912	-3.32192	-3.02204	Not Detected	Not Detected	Not Detected
hsa-mir-188-3p	-1.05907	down	1.16238	up	-3.23912	-3.32192	-3.02204	Not Detected	Not Detected	Not Detected
hsa-mir-188-5p	-1.11436	down	-14.122	down	0.797833	0.641618	-3.02204	Detected	Detected	Not Detected
hsa-mir-18a-3p	-1.05907	down	1.16238	up	-3.23912	-3.32192	-3.02204	Not Detected	Not Detected	Not Detected
hsa-mir-18a-5p	1.04561	up	-67.4511	down	3.05374	3.11808	-3.02204	Detected	Detected	Not Detected
hsa-mir-18b-3p	-1.05907	down	1.16238	up	-3.23912	-3.32192	-3.02204	Not Detected	Not Detected	Not Detected
hsa-mir-18b-5p	1.04944	up	-12.9232	down	0.669861	0.739474	-3.02204	Detected	Detected	Not Detected
hsa-mir-1908	-1.05907	down	1.16238	up	-3.23912	-3.32192	-3.02204	Not Detected	Not Detected	Not Detected
hsa-mir-1909-3p	-1.05907	down	1.16238	up	-3.23912	-3.32192	-3.02204	Not Detected	Not Detected	Not Detected
hsa-mir-1909-5p	-1.05907	down	1.16238	up	-3.23912	-3.32192	-3.02204	Not Detected	Not Detected	Not Detected
hsa-miR-190a	-1.05907	down	1.16238	up	-3.23912	-3.32192	-3.02204	Not Detected	Not Detected	Not Detected
hsa-mir-190b	-1.05907	down	1.16238	up	-3.23912	-3.32192	-3.02204	Not Detected	Not Detected	Not Detected
hsa-mir-1910	-1.05907	down	1.16238	up	-3.23912	-3.32192	-3.02204	Not Detected	Not Detected	Not Detected
hsa-mir-1911-3p	-1.05907	down	1.16238	up	-3.23912	-3.32192	-3.02204	Not Detected	Not Detected	Not Detected
hsa-mir-1911-5p	-1.05907	down	1.16238	up	-3.23912	-3.32192	-3.02204	Not Detected	Not Detected	Not Detected
hsa-mir-1912	-1.05907	down	1.16238	up	-3.23912	-3.32192	-3.02204	Not Detected	Not Detected	Not Detected
hsa-mir-1913	-1.05907	down	1.16238	up	-3.23912	-3.32192	-3.02204	Not Detected	Not Detected	Not Detected
hsa-mir-191-3p	-1.05907	down	1.16238	up	-3.23912	-3.32192	-3.02204	Not Detected	Not Detected	Not Detected
hsa-mir-1914-3p	11.0177	up	1.16238	up	-3.23912	0.222638	-3.02204	Not Detected	Detected	Not Detected
hsa-mir-1914-5p	-1.05907	down	1.16238	up	-3.23912	-3.32192	-3.02204	Not Detected	Not Detected	Not Detected
hsa-mir-1915-3p	-1.20163	down	1.3038	up	5.37449	5.1095	5.75722	Detected	Detected	Detected
hsa-mir-1915-5p	-1.05907	down	1.16238	up	-3.23912	-3.32192	-3.02204	Not Detected	Not Detected	Not Detected
hsa-mir-191-5p	-1.05907	down	1.16238	up	-3.23912	-3.32192	-3.02204	Not Detected	Not Detected	Not Detected
hsa-mir-192-3p	-1.05907	down	1.16238	up	-3.23912	-3.32192	-3.02204	Not Detected	Not Detected	Not Detected
hsa-mir-192-5p	1.38597	up	-1.92325	down	4.65067	5.12157	3.70713	Detected	Detected	Detected
hsa-mir-193a-3p	3.62994	up	-15.8432	down	0.963755	2.8237	-3.02204	Detected	Detected	Not Detected
hsa-mir-193a-5p	-1.05907	down	1.16238	up	-3.23912	-3.32192	-3.02204	Not Detected	Not Detected	Not Detected
hsa-mir-193b-3p	-1.01274	down	-15.1697	down	0.901084	0.882813	-3.02204	Detected	Detected	Not Detected
hsa-mir-193b-5p	-1.05907	down	1.16238	up	-3.23912	-3.32192	-3.02204	Not Detected	Not Detected	Not Detected
hsa-mir-194-3p	-1.05907	down	1.16238	up	-3.23912	-3.32192	-3.02204	Not Detected	Not Detected	Not Detected
hsa-mir-194-5p	3.3129	up	-16.3083	down	1.0055	2.73359	-3.02204	Detected	Detected	Not Detected
hsa-mir-195-3p	-1.05907	down	1.16238	up	-3.23912	-3.32192	-3.02204	Not Detected	Not Detected	Not Detected
hsa-mir-195-5p	1.12657	up	-13.0495	down	0.68389	0.855831	-3.02204	Detected	Detected	Not Detected
hsa-mir-196a-3p	-1.05907	down	1.16238	up	-3.23912	-3.32192	-3.02204	Not Detected	Not Detected	Not Detected
hsa-mir-196a-5p	-1.05907	down	1.16238	up	-3.23912	-3.32192	-3.02204	Not Detected	Not Detected	Not Detected
hsa-mir-196b-3p	-1.05907	down	1.16238	up	-3.23912	-3.32192	-3.02204	Not Detected	Not Detected	Not Detected
hsa-mir-196b-5p	-3.26484	down	-9.29842	down	0.19495	-1.51206	-3.02204	Detected	Detected	Not Detected
hsa-mir-1972	-1.05907	down	1.16238	up	-3.23912	-3.32192	-3.02204	Not Detected	Not Detected	Not Detected
hsa-mir-1973	-1.02953	down	-13.4348	down	0.725869	0.68389	-3.02204	Detected	Detected	Not Detected
hsa-mir-197-3p	-1.5328	down	1.14385	up	4.92767	4.3115	5.12157	Detected	Detected	Detected
hsa-mir-197-5p	1.01783	up	-1.15951	down	4.59856	4.62405	4.38504	Detected	Detected	Detected
hsa-mir-1976	-1.05907	down	1.16238	up	-3.23912	-3.32192	-3.02204	Not Detected	Not Detected	Not Detected
hsa-mir-198	-1.05907	down	1.16238	up	-3.23912	-3.32192	-3.02204	Not Detected	Not Detected	Not Detected
hsa-mir-199a-3p	1.02481	up	-11.6091	down	0.515154	0.550512	-3.02204	Detected	Detected	Not Detected
hsa-mir-199a-5p	-1.05907	down	1.16238	up	-3.23912	-3.32192	-3.02204	Not Detected	Not Detected	Not Detected
hsa-mir-199b-5p	-3.53366	down	-9.81175	down	0.272475	-1.54869	-3.02204	Detected	Detected	Not Detected
hsa-mir-19a-3p	1.26895	up	-1.43352	down	6.68092	7.02455	6.16135	Detected	Detected	Detected
hsa-mir-19a-5p	-1.05907	down	1.16238	up	-3.23912	-3.32192	-3.02204	Not Detected	Not Detected	Not Detected
hsa-mir-19b-3p	1.03526	up	-1.42462	down	8.86736	8.91735	8.35678	Detected	Detected	Detected
hsa-mir-200a-3p	-1.05907	down	1.16238	up	-3.23912	-3.32192	-3.02204	Not Detected	Not Detected	Not Detected
hsa-mir-200a-5p	-1.05907	down	1.16238	up	-3.23912	-3.32192	-3.02204	Not Detected	Not Detected	Not Detected
hsa-mir-200b-3p	3.03826	up	1.16238	up	-3.23912	-1.63587	-3.02204	Not Detected	Detected	Not Detected
hsa-mir-200b-5p	-1.05907	down	1.16238	up	-3.23912	-3.32192	-3.02204	Not Detected	Not Detected	Not Detected
hsa-mir-200c-3p	3.24727	up	1.16238	up	-3.23912	-1.53989	-3.02204	Not Detected	Detected	Not Detected
hsa-mir-200c-5p	-1.05907	down	1.16238	up	-3.23912	-3.32192	-3.02204	Not Detected	Not Detected	Not Detected
hsa-mir-202-3p	-1.05907	down	1.16238	up	-3.23912	-3.32192	-3.02204	Not Detected	Not Detected	Not Detected
hsa-mir-202-5p	-1.05907	down	1.16238	up	-3.23912	-3.32192	-3.02204	Not Detected	Not Detected	Not Detected
hsa-miR-203a	-1.05907	down	1.16238	up	-3.23912	-3.32192	-3.02204	Not Detected	Not Detected	Not Detected
hsa-mir-204-3p	-1.05907	down	1.16238	up	-3.23912	-3.32192	-3.02204	Not Detected	Not Detected	Not Detected
hsa-mir-204-5p	-1.05907	down	1.16238	up	-3.23912	-3.32192	-3.02204	Not Detected	Not Detected	Not Detected
hsa-mir-2052	-1.05907	down	1.16238	up	-3.23912	-3.32192	-3.02204	Not Detected	Not Detected	Not Detected
hsa-mir-2053	-1.05907	down	1.16238	up	-3.23912	-3.32192	-3.02204	Not Detected	Not Detected	Not Detected
hsa-mir-205-3p	1.18636	up	5.03271	up	3.19318	3.43972	5.52451	Detected	Detected	Detected
hsa-mir-205-5p	-1.05907	down	1.16238	up	-3.23912	-3.32192	-3.02204	Not Detected	Not Detected	Not Detected
hsa-mir-206	2.94774	up	1.16238	up	-3.23912	-1.67951	-3.02204	Not Detected	Detected	Not Detected
hsa-mir-208a	-1.05907	down	1.16238	up	-3.23912	-3.32192	-3.02204	Not Detected	Not Detected	Not Detected
hsa-mir-208b	-1.05907	down	1.16238	up	-3.23912	-3.32192	-3.02204	Not Detected	Not Detected	Not Detected
hsa-mir-20a-3p	1.31915	up	-13.5621	down	0.739474	1.13909	-3.02204	Detected	Detected	Not Detected
hsa-mir-20a-5p	1.186	up	-1.30984	down	8.30105	8.54715	7.91166	Detected	Detected	Detected
hsa-mir-20b-3p	-1.05907	down	1.16238	up	-3.23912	-3.32192	-3.02204	Not Detected	Not Detected	Not Detected
hsa-mir-20b-5p	1.11314	up	-1.76097	down	5.70233	5.85697	4.88596	Detected	Detected	Detected
hsa-mir-210	1.09792	up	-2.13788	down	3.91989	4.05466	2.8237	Detected	Detected	Detected
hsa-mir-2110	-1.05907	down	1.16238	up	-3.23912	-3.32192	-3.02204	Not Detected	Not Detected	Not Detected
hsa-mir-2113	-1.05907	down	1.16238	up	-3.23912	-3.32192	-3.02204	Not Detected	Not Detected	Not Detected
hsa-mir-211-3p	-1.12349	down	-18.6107	down	1.19602	1.02803	-3.02204	Detected	Detected	Not Detected
hsa-mir-211-5p	-1.05907	down	1.16238	up	-3.23912	-3.32192	-3.02204	Not Detected	Not Detected	Not Detected
hsa-mir-212-3p	1.23255	up	-15.0143	down	0.886232	1.18787	-3.02204	Detected	Detected	Not Detected
hsa-mir-212-5p	-1.05907	down	1.16238	up	-3.23912	-3.32192	-3.02204	Not Detected	Not Detected	Not Detected
hsa-mir-21-3p	1.25441	up	-1.93623	down	4.07133	4.39834	3.11808	Detected	Detected	Detected
hsa-mir-214-3p	-1.05907	down	1.16238	up	-3.23912	-3.32192	-3.02204	Not Detected	Not Detected	Not Detected
hsa-mir-214-5p	-1.05907	down	1.16238	up	-3.23912	-3.32192	-3.02204	Not Detected	Not Detected	Not Detected
hsa-mir-215	3.50402	up	-18.5058	down	1.18787	2.99688	-3.02204	Detected	Detected	Not Detected
hsa-mir-21-5p	-1	down	-1.48158	down	12.7916	12.7916	12.2244	Detected	Detected	Detected
hsa-mir-216a-3p	-1.05907	down	1.16238	up	-3.23912	-3.32192	-3.02204	Not Detected	Not Detected	Not Detected
hsa-mir-216a-5p	-1.05907	down	1.16238	up	-3.23912	-3.32192	-3.02204	Not Detected	Not Detected	Not Detected
hsa-mir-216b	-1.05907	down	1.16238	up	-3.23912	-3.32192	-3.02204	Not Detected	Not Detected	Not Detected
hsa-mir-217	-1.05907	down	1.16238	up	-3.23912	-3.32192	-3.02204	Not Detected	Not Detected	Not Detected
hsa-mir-218-5p	-1.05907	down	1.16238	up	-3.23912	-3.32192	-3.02204	Not Detected	Not Detected	Not Detected
hsa-mir-219-5p	-1.05907	down	1.16238	up	-3.23912	-3.32192	-3.02204	Not Detected	Not Detected	Not Detected
hsa-mir-221-3p	-3.8884	down	-63.413	down	2.96467	1.0055	-3.02204	Detected	Detected	Not Detected
hsa-mir-221-5p	3.54213	up	1.16238	up	-3.23912	-1.4145	-3.02204	Not Detected	Detected	Not Detected
hsa-mir-222-3p	1.23685	up	-53.7461	down	2.72605	3.03272	-3.02204	Detected	Detected	Not Detected
hsa-mir-222-5p	-1.05907	down	1.16238	up	-3.23912	-3.32192	-3.02204	Not Detected	Not Detected	Not Detected
hsa-mir-223-3p	1.16129	up	-1.13421	down	9.436	9.65173	9.25431	Detected	Detected	Detected
hsa-mir-223-5p	2.59991	up	1.16238	up	-3.23912	-1.86066	-3.02204	Not Detected	Detected	Not Detected
hsa-mir-22-3p	-1.08861	down	1.09501	up	7.56062	7.43813	7.69156	Detected	Detected	Detected
hsa-mir-224-3p	-1.05907	down	1.16238	up	-3.23912	-3.32192	-3.02204	Not Detected	Not Detected	Not Detected
hsa-mir-224-5p	-1.05907	down	1.16238	up	-3.23912	-3.32192	-3.02204	Not Detected	Not Detected	Not Detected
hsa-mir-22-5p	-1.05907	down	1.16238	up	-3.23912	-3.32192	-3.02204	Not Detected	Not Detected	Not Detected
hsa-mir-23a-3p	1.08596	up	-1.15638	down	8.03444	8.15341	7.82482	Detected	Detected	Detected
hsa-mir-23a-5p	-1.05907	down	1.16238	up	-3.23912	-3.32192	-3.02204	Not Detected	Not Detected	Not Detected
hsa-mir-23b-3p	1.27156	up	-1.54472	down	3.52174	3.86834	2.8944	Detected	Detected	Detected
hsa-mir-23b-5p	-1.05907	down	1.16238	up	-3.23912	-3.32192	-3.02204	Not Detected	Not Detected	Not Detected
hsa-mir-24-3p	-1.07987	down	-1.30739	down	7.82482	7.71397	7.43813	Detected	Detected	Detected
hsa-mir-25-3p	1.07532	up	-1.51637	down	6.82187	6.92663	6.22125	Detected	Detected	Detected
hsa-mir-25-5p	-1.05907	down	1.16238	up	-3.23912	-3.32192	-3.02204	Not Detected	Not Detected	Not Detected
hsa-mir-26a-5p	-1.04653	down	-1.39493	down	7.75718	7.69156	7.27698	Detected	Detected	Detected
hsa-mir-26b-3p	-1.05907	down	1.16238	up	-3.23912	-3.32192	-3.02204	Not Detected	Not Detected	Not Detected
hsa-mir-26b-5p	1.08777	up	-1.22572	down	8.97068	9.09206	8.67705	Detected	Detected	Detected
hsa-mir-27a-3p	-1	down	1.03358	up	7.98679	7.98679	8.03444	Detected	Detected	Detected
hsa-mir-27a-5p	-1.05907	down	1.16238	up	-3.23912	-3.32192	-3.02204	Not Detected	Not Detected	Not Detected
hsa-mir-27b-3p	1.11954	up	-1.54536	down	3.39321	3.55612	2.76526	Detected	Detected	Detected
hsa-mir-27b-5p	-1.05907	down	1.16238	up	-3.23912	-3.32192	-3.02204	Not Detected	Not Detected	Not Detected
hsa-mir-28-3p	-1.05907	down	1.16238	up	-3.23912	-3.32192	-3.02204	Not Detected	Not Detected	Not Detected
hsa-mir-28-5p	1.36974	up	-1.08765	down	4.38504	4.83894	4.26382	Detected	Detected	Detected
hsa-mir-296-3p	-1.05907	down	1.16238	up	-3.23912	-3.32192	-3.02204	Not Detected	Not Detected	Not Detected
hsa-mir-296-5p	-1.05907	down	1.16238	up	-3.23912	-3.32192	-3.02204	Not Detected	Not Detected	Not Detected
hsa-mir-297	-1.05907	down	1.16238	up	-3.23912	-3.32192	-3.02204	Not Detected	Not Detected	Not Detected
hsa-mir-298	-1.05907	down	1.16238	up	-3.23912	-3.32192	-3.02204	Not Detected	Not Detected	Not Detected
hsa-mir-299-3p	-1.05907	down	1.16238	up	-3.23912	-3.32192	-3.02204	Not Detected	Not Detected	Not Detected
hsa-mir-299-5p	-1.05907	down	1.16238	up	-3.23912	-3.32192	-3.02204	Not Detected	Not Detected	Not Detected
hsa-mir-29a-3p	1.35797	up	-1.08828	down	9.65173	10.0932	9.52968	Detected	Detected	Detected
hsa-mir-29a-5p	2.53448	up	1.16238	up	-3.23912	-1.89743	-3.02204	Not Detected	Detected	Not Detected
hsa-mir-29b-3p	1.73476	up	1.24761	up	8.38075	9.17548	8.69992	Detected	Detected	Detected
hsa-mir-29c-3p	1.14781	up	-1.25029	down	8.54715	8.74604	8.22488	Detected	Detected	Detected
hsa-mir-29c-5p	-1.09639	down	-13.2568	down	0.706629	0.573875	-3.02204	Detected	Detected	Not Detected
hsa-mir-300	-1.05907	down	1.16238	up	-3.23912	-3.32192	-3.02204	Not Detected	Not Detected	Not Detected
hsa-mir-301a-3p	4.57281	up	3.15763	up	1.13538	3.32846	2.79422	Detected	Detected	Detected
hsa-mir-301a-5p	-1.05907	down	1.16238	up	-3.23912	-3.32192	-3.02204	Not Detected	Not Detected	Not Detected
hsa-mir-301b	2.38708	up	1.16238	up	-3.23912	-1.98387	-3.02204	Not Detected	Detected	Not Detected
hsa-mir-302a-3p	-1.05907	down	1.16238	up	-3.23912	-3.32192	-3.02204	Not Detected	Not Detected	Not Detected
hsa-mir-302a-5p	-1.05907	down	1.16238	up	-3.23912	-3.32192	-3.02204	Not Detected	Not Detected	Not Detected
hsa-mir-302b-3p	-1.05907	down	1.16238	up	-3.23912	-3.32192	-3.02204	Not Detected	Not Detected	Not Detected
hsa-mir-302b-5p	-1.05907	down	1.16238	up	-3.23912	-3.32192	-3.02204	Not Detected	Not Detected	Not Detected
hsa-mir-302c-3p	-1.05907	down	1.16238	up	-3.23912	-3.32192	-3.02204	Not Detected	Not Detected	Not Detected
hsa-mir-302c-5p	-1.05907	down	1.16238	up	-3.23912	-3.32192	-3.02204	Not Detected	Not Detected	Not Detected
hsa-mir-302d-3p	-1.05907	down	1.16238	up	-3.23912	-3.32192	-3.02204	Not Detected	Not Detected	Not Detected
hsa-mir-302d-5p	-1.05907	down	1.16238	up	-3.23912	-3.32192	-3.02204	Not Detected	Not Detected	Not Detected
hsa-mir-302e	-1.05907	down	1.16238	up	-3.23912	-3.32192	-3.02204	Not Detected	Not Detected	Not Detected
hsa-mir-302f	-1.05907	down	1.16238	up	-3.23912	-3.32192	-3.02204	Not Detected	Not Detected	Not Detected
hsa-mir-30a-3p	-1.05907	down	1.16238	up	-3.23912	-3.32192	-3.02204	Not Detected	Not Detected	Not Detected
hsa-mir-30a-5p	3.22001	up	1.16238	up	-3.23912	-1.55205	-3.02204	Not Detected	Detected	Not Detected
hsa-mir-30b-3p	2.96928	up	1.16238	up	-3.23912	-1.66901	-3.02204	Not Detected	Detected	Not Detected
hsa-mir-30b-5p	1.14762	up	-1.42035	down	7.07833	7.27698	6.57208	Detected	Detected	Detected
hsa-mir-30c-5p	1.06781	up	-1.12212	down	5.86856	5.96321	5.70233	Detected	Detected	Detected
hsa-mir-30d-3p	-1.05907	down	1.16238	up	-3.23912	-3.32192	-3.02204	Not Detected	Not Detected	Not Detected
hsa-mir-30d-5p	-1	down	-1.45485	down	5.54221	5.54221	5.00134	Detected	Detected	Detected
hsa-mir-30e-3p	1.04292	up	-69.0716	down	3.08798	3.14861	-3.02204	Detected	Detected	Not Detected
hsa-mir-30e-5p	1.1422	up	-1.36807	down	6.08572	6.27753	5.63357	Detected	Detected	Detected
hsa-mir-31-3p	-2.67511	down	-44.7822	down	2.46282	1.04322	-3.02204	Detected	Detected	Not Detected
hsa-mir-31-5p	1.21905	up	-2.09928	down	3.79595	4.0817	2.72605	Detected	Detected	Detected
hsa-mir-320a	1.08765	up	-1.67736	down	4.26382	4.38504	3.51763	Detected	Detected	Detected
hsa-mir-320b	-1	down	-1.54324	down	5.66261	5.66261	5.03665	Detected	Detected	Detected
hsa-mir-320c	1.0354	up	1.02022	up	5.83968	5.88987	5.86856	Detected	Detected	Detected
hsa-mir-320d	-1	down	-1.12811	down	6.22125	6.22125	6.04734	Detected	Detected	Detected
hsa-miR-323a-3p	-1.05907	down	1.16238	up	-3.23912	-3.32192	-3.02204	Not Detected	Not Detected	Not Detected
hsa-miR-323a-5p	-1.05907	down	1.16238	up	-3.23912	-3.32192	-3.02204	Not Detected	Not Detected	Not Detected
hsa-miR-323b-5p	-1.05907	down	1.16238	up	-3.23912	-3.32192	-3.02204	Not Detected	Not Detected	Not Detected
hsa-mir-32-3p	-3.70592	down	3.10174	up	2.76526	0.875429	4.39834	Detected	Detected	Detected
hsa-mir-324-3p	1.03554	up	-1.52748	down	5.13207	5.18245	4.52091	Detected	Detected	Detected
hsa-mir-324-5p	-1.08726	down	-55.803	down	2.78024	2.65954	-3.02204	Detected	Detected	Not Detected
hsa-mir-325	-1.05907	down	1.16238	up	-3.23912	-3.32192	-3.02204	Not Detected	Not Detected	Not Detected
hsa-mir-32-5p	1.33079	up	-10.1219	down	0.317379	0.729664	-3.02204	Detected	Detected	Not Detected
hsa-mir-326	-1.05907	down	1.16238	up	-3.23912	-3.32192	-3.02204	Not Detected	Not Detected	Not Detected
hsa-mir-328	-1.05907	down	1.16238	up	-3.23912	-3.32192	-3.02204	Not Detected	Not Detected	Not Detected
hsa-mir-329	-1.05907	down	1.16238	up	-3.23912	-3.32192	-3.02204	Not Detected	Not Detected	Not Detected
hsa-mir-330-3p	3.27336	up	1.16238	up	-3.23912	-1.52834	-3.02204	Not Detected	Detected	Not Detected
hsa-mir-330-5p	-1.05907	down	1.16238	up	-3.23912	-3.32192	-3.02204	Not Detected	Not Detected	Not Detected
hsa-mir-331-3p	1.16422	up	-1.54768	down	5.49953	5.7189	4.86943	Detected	Detected	Detected
hsa-mir-331-5p	-1.05907	down	1.16238	up	-3.23912	-3.32192	-3.02204	Not Detected	Not Detected	Not Detected
hsa-mir-335-3p	-1.05907	down	1.16238	up	-3.23912	-3.32192	-3.02204	Not Detected	Not Detected	Not Detected
hsa-mir-335-5p	-1.05907	down	1.16238	up	-3.23912	-3.32192	-3.02204	Not Detected	Not Detected	Not Detected
hsa-mir-337-3p	-1.05907	down	1.16238	up	-3.23912	-3.32192	-3.02204	Not Detected	Not Detected	Not Detected
hsa-mir-337-5p	-1.05907	down	1.16238	up	-3.23912	-3.32192	-3.02204	Not Detected	Not Detected	Not Detected
hsa-mir-338-3p	1.40259	up	-1.42954	down	4.3115	4.79959	3.79595	Detected	Detected	Detected
hsa-mir-338-5p	-1.05907	down	1.16238	up	-3.23912	-3.32192	-3.02204	Not Detected	Not Detected	Not Detected
hsa-mir-339-3p	-1.05907	down	1.16238	up	-3.23912	-3.32192	-3.02204	Not Detected	Not Detected	Not Detected
hsa-mir-339-5p	-1.05907	down	1.16238	up	-3.23912	-3.32192	-3.02204	Not Detected	Not Detected	Not Detected
hsa-mir-33a-3p	-1.05907	down	1.16238	up	-3.23912	-3.32192	-3.02204	Not Detected	Not Detected	Not Detected
hsa-mir-33a-5p	1.2612	up	-11.1973	down	0.46304	0.797833	-3.02204	Detected	Detected	Not Detected
hsa-mir-33b-3p	-12.9891	down	-10.5512	down	0.377306	-3.32192	-3.02204	Detected	Not Detected	Not Detected
hsa-mir-33b-5p	-1.05907	down	1.16238	up	-3.23912	-3.32192	-3.02204	Not Detected	Not Detected	Not Detected
hsa-mir-340-3p	-1.2096	down	-11.8063	down	0.539452	0.264916	-3.02204	Detected	Detected	Not Detected
hsa-mir-340-5p	1.46201	up	-9.44616	down	0.217692	0.765648	-3.02204	Detected	Detected	Not Detected
hsa-mir-342-3p	-1.0475	down	-1.10633	down	9.32127	9.25431	9.17548	Detected	Detected	Detected
hsa-mir-342-5p	1.01157	up	-1.16849	down	6.14475	6.16135	5.9201	Detected	Detected	Detected
hsa-mir-345-3p	-1.05907	down	1.16238	up	-3.23912	-3.32192	-3.02204	Not Detected	Not Detected	Not Detected
hsa-mir-345-5p	-1.05907	down	1.16238	up	-3.23912	-3.32192	-3.02204	Not Detected	Not Detected	Not Detected
hsa-mir-346	-1.05907	down	1.16238	up	-3.23912	-3.32192	-3.02204	Not Detected	Not Detected	Not Detected
hsa-mir-34a-3p	-1.05907	down	1.16238	up	-3.23912	-3.32192	-3.02204	Not Detected	Not Detected	Not Detected
hsa-mir-34a-5p	1.19849	up	-1.43632	down	6.24128	6.50249	5.7189	Detected	Detected	Detected
hsa-mir-34b-3p	-1.05907	down	1.16238	up	-3.23912	-3.32192	-3.02204	Not Detected	Not Detected	Not Detected
hsa-mir-34b-5p	12.2826	up	1.16238	up	-3.23912	0.379431	-3.02204	Not Detected	Detected	Not Detected
hsa-mir-34c-3p	-1.05907	down	1.16238	up	-3.23912	-3.32192	-3.02204	Not Detected	Not Detected	Not Detected
hsa-mir-34c-5p	-1.05907	down	1.16238	up	-3.23912	-3.32192	-3.02204	Not Detected	Not Detected	Not Detected
hsa-mir-361-3p	1.36228	up	-1.30665	down	3.47386	3.91989	3.08798	Detected	Detected	Detected
hsa-mir-361-5p	-1.04639	down	-1.6116	down	4.0817	4.01628	3.39321	Detected	Detected	Detected
hsa-mir-362-3p	2.84567	up	-15.3033	down	0.913735	2.4225	-3.02204	Detected	Detected	Not Detected
hsa-mir-362-5p	3.28429	up	-18.015	down	1.14909	2.86467	-3.02204	Detected	Detected	Not Detected
hsa-mir-363-3p	1.17156	up	-1.58003	down	5.24258	5.47102	4.58263	Detected	Detected	Detected
hsa-mir-363-5p	-1.05907	down	1.16238	up	-3.23912	-3.32192	-3.02204	Not Detected	Not Detected	Not Detected
hsa-miR-365a-3p	-1.08105	down	-72.918	down	3.16617	3.05374	-3.02204	Detected	Detected	Not Detected
hsa-miR-365a-5p	-1.05907	down	1.16238	up	-3.23912	-3.32192	-3.02204	Not Detected	Not Detected	Not Detected
hsa-miR-365b-5p	-1.05907	down	1.16238	up	-3.23912	-3.32192	-3.02204	Not Detected	Not Detected	Not Detected
hsa-mir-367-3p	-1.05907	down	1.16238	up	-3.23912	-3.32192	-3.02204	Not Detected	Not Detected	Not Detected
hsa-mir-367-5p	-1.05907	down	1.16238	up	-3.23912	-3.32192	-3.02204	Not Detected	Not Detected	Not Detected
hsa-mir-369-3p	-1.05907	down	1.16238	up	-3.23912	-3.32192	-3.02204	Not Detected	Not Detected	Not Detected
hsa-mir-369-5p	-1.05907	down	1.16238	up	-3.23912	-3.32192	-3.02204	Not Detected	Not Detected	Not Detected
hsa-mir-370	-1.05907	down	1.16238	up	-3.23912	-3.32192	-3.02204	Not Detected	Not Detected	Not Detected
hsa-miR-371a-3p	-1.05907	down	1.16238	up	-3.23912	-3.32192	-3.02204	Not Detected	Not Detected	Not Detected
hsa-miR-371a-5p	-8.83773	down	-7.17905	down	-0.178242	-3.32192	-3.02204	Detected	Not Detected	Not Detected
hsa-mir-372	-1.05907	down	1.16238	up	-3.23912	-3.32192	-3.02204	Not Detected	Not Detected	Not Detected
hsa-mir-373-3p	-1.05907	down	1.16238	up	-3.23912	-3.32192	-3.02204	Not Detected	Not Detected	Not Detected
hsa-mir-373-5p	-1.05907	down	1.16238	up	-3.23912	-3.32192	-3.02204	Not Detected	Not Detected	Not Detected
hsa-mir-374a-3p	-1.05907	down	1.16238	up	-3.23912	-3.32192	-3.02204	Not Detected	Not Detected	Not Detected
hsa-mir-374a-5p	1.30762	up	-1.78746	down	5.06422	5.45116	4.22631	Detected	Detected	Detected
hsa-mir-374b-3p	-1.05907	down	1.16238	up	-3.23912	-3.32192	-3.02204	Not Detected	Not Detected	Not Detected
hsa-mir-374b-5p	-1.07656	down	-143.463	down	4.1425	4.03607	-3.02204	Detected	Detected	Not Detected
hsa-mir-375	-1.05907	down	1.16238	up	-3.23912	-3.32192	-3.02204	Not Detected	Not Detected	Not Detected
hsa-mir-376a-3p	-1.05907	down	1.16238	up	-3.23912	-3.32192	-3.02204	Not Detected	Not Detected	Not Detected
hsa-mir-376a-5p	-1.05907	down	1.16238	up	-3.23912	-3.32192	-3.02204	Not Detected	Not Detected	Not Detected
hsa-mir-376b-3p	-1.05907	down	1.16238	up	-3.23912	-3.32192	-3.02204	Not Detected	Not Detected	Not Detected
hsa-mir-376b-5p	-1.05907	down	1.16238	up	-3.23912	-3.32192	-3.02204	Not Detected	Not Detected	Not Detected
hsa-mir-376c-3p	-1.05907	down	1.16238	up	-3.23912	-3.32192	-3.02204	Not Detected	Not Detected	Not Detected
hsa-mir-376c-5p	-1.05907	down	1.16238	up	-3.23912	-3.32192	-3.02204	Not Detected	Not Detected	Not Detected
hsa-mir-377-3p	-1.05907	down	1.16238	up	-3.23912	-3.32192	-3.02204	Not Detected	Not Detected	Not Detected
hsa-mir-377-5p	-1.05907	down	1.16238	up	-3.23912	-3.32192	-3.02204	Not Detected	Not Detected	Not Detected
hsa-miR-378a-3p	-1.25181	down	-1.10261	down	6.46877	6.14475	6.32784	Detected	Detected	Detected
hsa-miR-378a-5p	2.99263	up	1.16238	up	-3.23912	-1.6577	-3.02204	Not Detected	Detected	Not Detected
hsa-mir-379-3p	-1.05907	down	1.16238	up	-3.23912	-3.32192	-3.02204	Not Detected	Not Detected	Not Detected
hsa-mir-379-5p	-1.05907	down	1.16238	up	-3.23912	-3.32192	-3.02204	Not Detected	Not Detected	Not Detected
hsa-mir-380-3p	-1.05907	down	1.16238	up	-3.23912	-3.32192	-3.02204	Not Detected	Not Detected	Not Detected
hsa-mir-380-5p	-1.05907	down	1.16238	up	-3.23912	-3.32192	-3.02204	Not Detected	Not Detected	Not Detected
hsa-mir-381-3p	-1.05907	down	1.16238	up	-3.23912	-3.32192	-3.02204	Not Detected	Not Detected	Not Detected
hsa-mir-381-5p	-1.05907	down	1.16238	up	-3.23912	-3.32192	-3.02204	Not Detected	Not Detected	Not Detected
hsa-mir-382-3p	-1.05907	down	1.16238	up	-3.23912	-3.32192	-3.02204	Not Detected	Not Detected	Not Detected
hsa-mir-382-5p	-1.05907	down	1.16238	up	-3.23912	-3.32192	-3.02204	Not Detected	Not Detected	Not Detected
hsa-mir-383	-1.05907	down	1.16238	up	-3.23912	-3.32192	-3.02204	Not Detected	Not Detected	Not Detected
hsa-mir-384	-1.05907	down	1.16238	up	-3.23912	-3.32192	-3.02204	Not Detected	Not Detected	Not Detected
hsa-mir-409-3p	-1.05907	down	1.16238	up	-3.23912	-3.32192	-3.02204	Not Detected	Not Detected	Not Detected
hsa-mir-409-5p	-1.05907	down	1.16238	up	-3.23912	-3.32192	-3.02204	Not Detected	Not Detected	Not Detected
hsa-mir-410	-1.05907	down	1.16238	up	-3.23912	-3.32192	-3.02204	Not Detected	Not Detected	Not Detected
hsa-mir-411-3p	-1.05907	down	1.16238	up	-3.23912	-3.32192	-3.02204	Not Detected	Not Detected	Not Detected
hsa-mir-411-5p	-1.05907	down	1.16238	up	-3.23912	-3.32192	-3.02204	Not Detected	Not Detected	Not Detected
hsa-mir-412	-1.05907	down	1.16238	up	-3.23912	-3.32192	-3.02204	Not Detected	Not Detected	Not Detected
hsa-mir-421	-1.05907	down	1.16238	up	-3.23912	-3.32192	-3.02204	Not Detected	Not Detected	Not Detected
hsa-mir-422a	-1.05907	down	1.16238	up	-3.23912	-3.32192	-3.02204	Not Detected	Not Detected	Not Detected
hsa-mir-423-3p	-1.05907	down	1.16238	up	-3.23912	-3.32192	-3.02204	Not Detected	Not Detected	Not Detected
hsa-mir-423-5p	-2.55305	down	1.19674	up	2.4225	1.07028	2.68161	Detected	Detected	Detected
hsa-mir-424-3p	2.91717	up	1.16238	up	-3.23912	-1.69454	-3.02204	Not Detected	Detected	Not Detected
hsa-mir-424-5p	1.19006	up	-1.70994	down	3.51763	3.76867	2.74368	Detected	Detected	Detected
hsa-mir-425-3p	-1.05907	down	1.16238	up	-3.23912	-3.32192	-3.02204	Not Detected	Not Detected	Not Detected
hsa-mir-425-5p	1.23219	up	-2.65179	down	4.73542	5.03665	3.32846	Detected	Detected	Detected
hsa-mir-429	-1.05907	down	1.16238	up	-3.23912	-3.32192	-3.02204	Not Detected	Not Detected	Not Detected
hsa-mir-431-3p	-1.05907	down	1.16238	up	-3.23912	-3.32192	-3.02204	Not Detected	Not Detected	Not Detected
hsa-mir-431-5p	-1.05907	down	1.16238	up	-3.23912	-3.32192	-3.02204	Not Detected	Not Detected	Not Detected
hsa-mir-432-3p	-1.05907	down	1.16238	up	-3.23912	-3.32192	-3.02204	Not Detected	Not Detected	Not Detected
hsa-mir-432-5p	-1.05907	down	1.16238	up	-3.23912	-3.32192	-3.02204	Not Detected	Not Detected	Not Detected
hsa-mir-433	-1.05907	down	1.16238	up	-3.23912	-3.32192	-3.02204	Not Detected	Not Detected	Not Detected
hsa-mir-448	-1.05907	down	1.16238	up	-3.23912	-3.32192	-3.02204	Not Detected	Not Detected	Not Detected
hsa-mir-449a	2.99946	up	1.16238	up	-3.23912	-1.65441	-3.02204	Not Detected	Detected	Not Detected
hsa-mir-449b-3p	-1.05907	down	1.16238	up	-3.23912	-3.32192	-3.02204	Not Detected	Not Detected	Not Detected
hsa-mir-449b-5p	-1.05907	down	1.16238	up	-3.23912	-3.32192	-3.02204	Not Detected	Not Detected	Not Detected
hsa-mir-450a-3p	-1.05907	down	1.16238	up	-3.23912	-3.32192	-3.02204	Not Detected	Not Detected	Not Detected
hsa-mir-450a-5p	-1.05907	down	1.16238	up	-3.23912	-3.32192	-3.02204	Not Detected	Not Detected	Not Detected
hsa-mir-450b-3p	-1.05907	down	1.16238	up	-3.23912	-3.32192	-3.02204	Not Detected	Not Detected	Not Detected
hsa-mir-450b-5p	-1.05907	down	1.16238	up	-3.23912	-3.32192	-3.02204	Not Detected	Not Detected	Not Detected
hsa-miR-451a	1.27128	up	-1.09062	down	8.11194	8.45822	7.98679	Detected	Detected	Detected
hsa-mir-452-3p	-1.05907	down	1.16238	up	-3.23912	-3.32192	-3.02204	Not Detected	Not Detected	Not Detected
hsa-mir-452-5p	-1.05907	down	1.16238	up	-3.23912	-3.32192	-3.02204	Not Detected	Not Detected	Not Detected
hsa-mir-454-3p	1.05615	up	3.3543	up	1.07028	1.14909	2.81629	Detected	Detected	Detected
hsa-mir-454-5p	-1.05907	down	1.16238	up	-3.23912	-3.32192	-3.02204	Not Detected	Not Detected	Not Detected
hsa-mir-455-3p	-1.05907	down	1.16238	up	-3.23912	-3.32192	-3.02204	Not Detected	Not Detected	Not Detected
hsa-mir-455-5p	-1.05907	down	1.16238	up	-3.23912	-3.32192	-3.02204	Not Detected	Not Detected	Not Detected
hsa-mir-483-3p	-1.05907	down	1.16238	up	-3.23912	-3.32192	-3.02204	Not Detected	Not Detected	Not Detected
hsa-mir-483-5p	-1	down	-11.9975	down	0.562629	0.562629	-3.02204	Detected	Detected	Not Detected
hsa-mir-484	-3.60413	down	-11.8972	down	0.550512	-1.29914	-3.02204	Detected	Detected	Not Detected
hsa-mir-485-3p	-1.05907	down	1.16238	up	-3.23912	-3.32192	-3.02204	Not Detected	Not Detected	Not Detected
hsa-mir-485-5p	-1.05907	down	1.16238	up	-3.23912	-3.32192	-3.02204	Not Detected	Not Detected	Not Detected
hsa-mir-486-3p	2.70749	up	1.16238	up	-3.23912	-1.80216	-3.02204	Not Detected	Detected	Not Detected
hsa-mir-486-5p	-1.03601	down	-57.2153	down	2.81629	2.76526	-3.02204	Detected	Detected	Not Detected
hsa-mir-487a	-1.05907	down	1.16238	up	-3.23912	-3.32192	-3.02204	Not Detected	Not Detected	Not Detected
hsa-mir-487b	2.94978	up	1.16238	up	-3.23912	-1.67851	-3.02204	Not Detected	Detected	Not Detected
hsa-mir-488-3p	-1.05907	down	1.16238	up	-3.23912	-3.32192	-3.02204	Not Detected	Not Detected	Not Detected
hsa-mir-488-5p	-1.05907	down	1.16238	up	-3.23912	-3.32192	-3.02204	Not Detected	Not Detected	Not Detected
hsa-mir-489	-1.05907	down	1.16238	up	-3.23912	-3.32192	-3.02204	Not Detected	Not Detected	Not Detected
hsa-mir-490-3p	-1.05907	down	1.16238	up	-3.23912	-3.32192	-3.02204	Not Detected	Not Detected	Not Detected
hsa-mir-490-5p	-1.05907	down	1.16238	up	-3.23912	-3.32192	-3.02204	Not Detected	Not Detected	Not Detected
hsa-mir-491-3p	-1.05907	down	1.16238	up	-3.23912	-3.32192	-3.02204	Not Detected	Not Detected	Not Detected
hsa-mir-491-5p	-1.05907	down	1.16238	up	-3.23912	-3.32192	-3.02204	Not Detected	Not Detected	Not Detected
hsa-mir-492	-1.05907	down	1.16238	up	-3.23912	-3.32192	-3.02204	Not Detected	Not Detected	Not Detected
hsa-mir-493-3p	-1.05907	down	1.16238	up	-3.23912	-3.32192	-3.02204	Not Detected	Not Detected	Not Detected
hsa-mir-493-5p	-1.05907	down	1.16238	up	-3.23912	-3.32192	-3.02204	Not Detected	Not Detected	Not Detected
hsa-mir-494	1.43972	up	-1.33108	down	5.03665	5.56243	4.62405	Detected	Detected	Detected
hsa-mir-495-3p	-1.05907	down	1.16238	up	-3.23912	-3.32192	-3.02204	Not Detected	Not Detected	Not Detected
hsa-mir-495-5p	-1.05907	down	1.16238	up	-3.23912	-3.32192	-3.02204	Not Detected	Not Detected	Not Detected
hsa-mir-496	-1.05907	down	1.16238	up	-3.23912	-3.32192	-3.02204	Not Detected	Not Detected	Not Detected
hsa-mir-497-3p	-1.05907	down	1.16238	up	-3.23912	-3.32192	-3.02204	Not Detected	Not Detected	Not Detected
hsa-mir-497-5p	-1.05907	down	1.16238	up	-3.23912	-3.32192	-3.02204	Not Detected	Not Detected	Not Detected
hsa-mir-498	-15.0803	down	4.82992	up	0.592674	-3.32192	2.86467	Detected	Not Detected	Detected
hsa-miR-499a-3p	-1.05907	down	1.16238	up	-3.23912	-3.32192	-3.02204	Not Detected	Not Detected	Not Detected
hsa-miR-499a-5p	-1.05907	down	1.16238	up	-3.23912	-3.32192	-3.02204	Not Detected	Not Detected	Not Detected
hsa-miR-500a-3p	-3.3027	down	-10.8678	down	0.419953	-1.30369	-3.02204	Detected	Detected	Not Detected
hsa-miR-500a-5p	2.68249	up	1.16238	up	-3.23912	-1.81554	-3.02204	Not Detected	Detected	Not Detected
hsa-mir-501-3p	-1.05907	down	1.16238	up	-3.23912	-3.32192	-3.02204	Not Detected	Not Detected	Not Detected
hsa-mir-501-5p	-1.05907	down	1.16238	up	-3.23912	-3.32192	-3.02204	Not Detected	Not Detected	Not Detected
hsa-mir-502-3p	-1.30304	down	-12.1687	down	0.583069	0.201193	-3.02204	Detected	Detected	Not Detected
hsa-mir-502-5p	3.18509	up	1.16238	up	-3.23912	-1.56778	-3.02204	Not Detected	Detected	Not Detected
hsa-mir-503-3p	-1.05907	down	1.16238	up	-3.23912	-3.32192	-3.02204	Not Detected	Not Detected	Not Detected
hsa-mir-503-5p	-1.05907	down	1.16238	up	-3.23912	-3.32192	-3.02204	Not Detected	Not Detected	Not Detected
hsa-mir-504	-1.05907	down	1.16238	up	-3.23912	-3.32192	-3.02204	Not Detected	Not Detected	Not Detected
hsa-mir-505-3p	-1.26593	down	-11.7338	down	0.530565	0.190363	-3.02204	Detected	Detected	Not Detected
hsa-mir-505-5p	1.31841	up	-7.17905	down	-0.178242	0.220558	-3.02204	Detected	Detected	Not Detected
hsa-mir-506-3p	-1.05907	down	1.16238	up	-3.23912	-3.32192	-3.02204	Not Detected	Not Detected	Not Detected
hsa-mir-506-5p	-1.05907	down	1.16238	up	-3.23912	-3.32192	-3.02204	Not Detected	Not Detected	Not Detected
hsa-mir-507	-1.05907	down	1.16238	up	-3.23912	-3.32192	-3.02204	Not Detected	Not Detected	Not Detected
hsa-mir-508-3p	-1.05907	down	1.16238	up	-3.23912	-3.32192	-3.02204	Not Detected	Not Detected	Not Detected
hsa-mir-508-5p	-1.05907	down	1.16238	up	-3.23912	-3.32192	-3.02204	Not Detected	Not Detected	Not Detected
hsa-mir-509-3p	-1.05907	down	1.16238	up	-3.23912	-3.32192	-3.02204	Not Detected	Not Detected	Not Detected
hsa-mir-509-5p	-1.05907	down	1.16238	up	-3.23912	-3.32192	-3.02204	Not Detected	Not Detected	Not Detected
hsa-mir-510	-1.05907	down	1.16238	up	-3.23912	-3.32192	-3.02204	Not Detected	Not Detected	Not Detected
hsa-mir-511	-1.05907	down	1.16238	up	-3.23912	-3.32192	-3.02204	Not Detected	Not Detected	Not Detected
hsa-mir-512-3p	-1.05907	down	1.16238	up	-3.23912	-3.32192	-3.02204	Not Detected	Not Detected	Not Detected
hsa-mir-512-5p	-1.05907	down	1.16238	up	-3.23912	-3.32192	-3.02204	Not Detected	Not Detected	Not Detected
hsa-mir-513a-3p	-1.05907	down	1.16238	up	-3.23912	-3.32192	-3.02204	Not Detected	Not Detected	Not Detected
hsa-mir-513a-5p	-1.20869	down	-17.9354	down	1.1427	0.86926	-3.02204	Detected	Detected	Not Detected
hsa-mir-513b	-1.05907	down	1.16238	up	-3.23912	-3.32192	-3.02204	Not Detected	Not Detected	Not Detected
hsa-mir-513c-3p	-1.05907	down	1.16238	up	-3.23912	-3.32192	-3.02204	Not Detected	Not Detected	Not Detected
hsa-mir-513c-5p	-1.05907	down	1.16238	up	-3.23912	-3.32192	-3.02204	Not Detected	Not Detected	Not Detected
hsa-miR-514a-3p	-1.05907	down	1.16238	up	-3.23912	-3.32192	-3.02204	Not Detected	Not Detected	Not Detected
hsa-miR-514a-5p	-1.05907	down	1.16238	up	-3.23912	-3.32192	-3.02204	Not Detected	Not Detected	Not Detected
hsa-mir-515-3p	-1.05907	down	1.16238	up	-3.23912	-3.32192	-3.02204	Not Detected	Not Detected	Not Detected
hsa-mir-515-5p	-1.05907	down	1.16238	up	-3.23912	-3.32192	-3.02204	Not Detected	Not Detected	Not Detected
hsa-mir-516a-3p	-1.05907	down	1.16238	up	-3.23912	-3.32192	-3.02204	Not Detected	Not Detected	Not Detected
hsa-mir-516a-5p	-1.05907	down	1.16238	up	-3.23912	-3.32192	-3.02204	Not Detected	Not Detected	Not Detected
hsa-mir-516b-5p	-1.05907	down	1.16238	up	-3.23912	-3.32192	-3.02204	Not Detected	Not Detected	Not Detected
hsa-mir-517a-3p	-1.05907	down	1.16238	up	-3.23912	-3.32192	-3.02204	Not Detected	Not Detected	Not Detected
hsa-mir-517c-3p	-1.05907	down	1.16238	up	-3.23912	-3.32192	-3.02204	Not Detected	Not Detected	Not Detected
hsa-mir-518a-3p	-1.05907	down	1.16238	up	-3.23912	-3.32192	-3.02204	Not Detected	Not Detected	Not Detected
hsa-mir-518a-5p	-1.05907	down	1.16238	up	-3.23912	-3.32192	-3.02204	Not Detected	Not Detected	Not Detected
hsa-mir-518b	-1.05907	down	1.16238	up	-3.23912	-3.32192	-3.02204	Not Detected	Not Detected	Not Detected
hsa-mir-518c-3p	-1.05907	down	1.16238	up	-3.23912	-3.32192	-3.02204	Not Detected	Not Detected	Not Detected
hsa-mir-518c-5p	-1.05907	down	1.16238	up	-3.23912	-3.32192	-3.02204	Not Detected	Not Detected	Not Detected
hsa-mir-518d-3p	-1.05907	down	1.16238	up	-3.23912	-3.32192	-3.02204	Not Detected	Not Detected	Not Detected
hsa-mir-518e-3p	-1.05907	down	1.16238	up	-3.23912	-3.32192	-3.02204	Not Detected	Not Detected	Not Detected
hsa-mir-518e-5p	-1.05907	down	1.16238	up	-3.23912	-3.32192	-3.02204	Not Detected	Not Detected	Not Detected
hsa-mir-518f-3p	-1.05907	down	1.16238	up	-3.23912	-3.32192	-3.02204	Not Detected	Not Detected	Not Detected
hsa-mir-518f-5p	-1.05907	down	1.16238	up	-3.23912	-3.32192	-3.02204	Not Detected	Not Detected	Not Detected
hsa-mir-519b-3p	-1.05907	down	1.16238	up	-3.23912	-3.32192	-3.02204	Not Detected	Not Detected	Not Detected
hsa-mir-519c-3p	-1.05907	down	1.16238	up	-3.23912	-3.32192	-3.02204	Not Detected	Not Detected	Not Detected
hsa-mir-519d	-1.05907	down	1.16238	up	-3.23912	-3.32192	-3.02204	Not Detected	Not Detected	Not Detected
hsa-mir-519e-3p	-1.05907	down	1.16238	up	-3.23912	-3.32192	-3.02204	Not Detected	Not Detected	Not Detected
hsa-mir-519e-5p	-1.05907	down	1.16238	up	-3.23912	-3.32192	-3.02204	Not Detected	Not Detected	Not Detected
hsa-mir-520a-3p	-1.05907	down	1.16238	up	-3.23912	-3.32192	-3.02204	Not Detected	Not Detected	Not Detected
hsa-mir-520a-5p	-1.05907	down	1.16238	up	-3.23912	-3.32192	-3.02204	Not Detected	Not Detected	Not Detected
hsa-mir-520b	-1.05907	down	1.16238	up	-3.23912	-3.32192	-3.02204	Not Detected	Not Detected	Not Detected
hsa-mir-520c-3p	-1.05907	down	1.16238	up	-3.23912	-3.32192	-3.02204	Not Detected	Not Detected	Not Detected
hsa-mir-520d-3p	-1.05907	down	1.16238	up	-3.23912	-3.32192	-3.02204	Not Detected	Not Detected	Not Detected
hsa-mir-520e	-1.05907	down	1.16238	up	-3.23912	-3.32192	-3.02204	Not Detected	Not Detected	Not Detected
hsa-mir-520f	2.91656	up	1.16238	up	-3.23912	-1.69485	-3.02204	Not Detected	Detected	Not Detected
hsa-mir-520g	-1.05907	down	1.16238	up	-3.23912	-3.32192	-3.02204	Not Detected	Not Detected	Not Detected
hsa-mir-520h	-1.05907	down	1.16238	up	-3.23912	-3.32192	-3.02204	Not Detected	Not Detected	Not Detected
hsa-mir-521	-1.05907	down	1.16238	up	-3.23912	-3.32192	-3.02204	Not Detected	Not Detected	Not Detected
hsa-mir-522-3p	-1.05907	down	1.16238	up	-3.23912	-3.32192	-3.02204	Not Detected	Not Detected	Not Detected
hsa-mir-523-3p	-1.05907	down	1.16238	up	-3.23912	-3.32192	-3.02204	Not Detected	Not Detected	Not Detected
hsa-mir-524-3p	-1.05907	down	1.16238	up	-3.23912	-3.32192	-3.02204	Not Detected	Not Detected	Not Detected
hsa-mir-525-3p	-1.05907	down	1.16238	up	-3.23912	-3.32192	-3.02204	Not Detected	Not Detected	Not Detected
hsa-mir-525-5p	-1.05907	down	1.16238	up	-3.23912	-3.32192	-3.02204	Not Detected	Not Detected	Not Detected
hsa-mir-526b-3p	-1.05907	down	1.16238	up	-3.23912	-3.32192	-3.02204	Not Detected	Not Detected	Not Detected
hsa-mir-526b-5p	-1.05907	down	1.16238	up	-3.23912	-3.32192	-3.02204	Not Detected	Not Detected	Not Detected
hsa-mir-532-3p	-1.19465	down	-14.7012	down	0.855831	0.599241	-3.02204	Detected	Detected	Not Detected
hsa-mir-532-5p	3.39624	up	-17.7839	down	1.13046	2.8944	-3.02204	Detected	Detected	Not Detected
hsa-mir-539-3p	-1.05907	down	1.16238	up	-3.23912	-3.32192	-3.02204	Not Detected	Not Detected	Not Detected
hsa-mir-539-5p	-1.05907	down	1.16238	up	-3.23912	-3.32192	-3.02204	Not Detected	Not Detected	Not Detected
hsa-mir-541-3p	-1.05907	down	1.16238	up	-3.23912	-3.32192	-3.02204	Not Detected	Not Detected	Not Detected
hsa-mir-541-5p	-1.05907	down	1.16238	up	-3.23912	-3.32192	-3.02204	Not Detected	Not Detected	Not Detected
hsa-mir-542-3p	-1.05907	down	1.16238	up	-3.23912	-3.32192	-3.02204	Not Detected	Not Detected	Not Detected
hsa-mir-542-5p	-1.05907	down	1.16238	up	-3.23912	-3.32192	-3.02204	Not Detected	Not Detected	Not Detected
hsa-mir-543	-1.05907	down	1.16238	up	-3.23912	-3.32192	-3.02204	Not Detected	Not Detected	Not Detected
hsa-miR-544a	-1.05907	down	1.16238	up	-3.23912	-3.32192	-3.02204	Not Detected	Not Detected	Not Detected
hsa-mir-545-3p	-1.05907	down	1.16238	up	-3.23912	-3.32192	-3.02204	Not Detected	Not Detected	Not Detected
hsa-mir-545-5p	-1.05907	down	1.16238	up	-3.23912	-3.32192	-3.02204	Not Detected	Not Detected	Not Detected
hsa-mir-548a-3p	-1.05907	down	1.16238	up	-3.23912	-3.32192	-3.02204	Not Detected	Not Detected	Not Detected
hsa-mir-548a-5p	-1.05907	down	1.16238	up	-3.23912	-3.32192	-3.02204	Not Detected	Not Detected	Not Detected
hsa-mir-548b-3p	-1.05907	down	1.16238	up	-3.23912	-3.32192	-3.02204	Not Detected	Not Detected	Not Detected
hsa-mir-548b-5p	-1.05907	down	1.16238	up	-3.23912	-3.32192	-3.02204	Not Detected	Not Detected	Not Detected
hsa-mir-548c-3p	-1.05907	down	1.16238	up	-3.23912	-3.32192	-3.02204	Not Detected	Not Detected	Not Detected
hsa-mir-548d-3p	-1.05907	down	1.16238	up	-3.23912	-3.32192	-3.02204	Not Detected	Not Detected	Not Detected
hsa-mir-548d-5p	-1.05907	down	1.16238	up	-3.23912	-3.32192	-3.02204	Not Detected	Not Detected	Not Detected
hsa-mir-548e	-1.05907	down	1.16238	up	-3.23912	-3.32192	-3.02204	Not Detected	Not Detected	Not Detected
hsa-mir-548f	-1.05907	down	1.16238	up	-3.23912	-3.32192	-3.02204	Not Detected	Not Detected	Not Detected
hsa-mir-548g-3p	-1.05907	down	1.16238	up	-3.23912	-3.32192	-3.02204	Not Detected	Not Detected	Not Detected
hsa-mir-548h-3p	-1.05907	down	1.16238	up	-3.23912	-3.32192	-3.02204	Not Detected	Not Detected	Not Detected
hsa-mir-548h-5p	-1.05907	down	1.16238	up	-3.23912	-3.32192	-3.02204	Not Detected	Not Detected	Not Detected
hsa-mir-548i	-1.05907	down	1.16238	up	-3.23912	-3.32192	-3.02204	Not Detected	Not Detected	Not Detected
hsa-mir-548j	-1.05907	down	1.16238	up	-3.23912	-3.32192	-3.02204	Not Detected	Not Detected	Not Detected
hsa-mir-548k	-1.05907	down	1.16238	up	-3.23912	-3.32192	-3.02204	Not Detected	Not Detected	Not Detected
hsa-mir-548l	-1.05907	down	1.16238	up	-3.23912	-3.32192	-3.02204	Not Detected	Not Detected	Not Detected
hsa-mir-548m	-1.05907	down	1.16238	up	-3.23912	-3.32192	-3.02204	Not Detected	Not Detected	Not Detected
hsa-mir-548n	-1.05907	down	1.16238	up	-3.23912	-3.32192	-3.02204	Not Detected	Not Detected	Not Detected
hsa-mir-548p	-1.05907	down	1.16238	up	-3.23912	-3.32192	-3.02204	Not Detected	Not Detected	Not Detected
hsa-miR-549a	-1.05907	down	1.16238	up	-3.23912	-3.32192	-3.02204	Not Detected	Not Detected	Not Detected
hsa-miR-550a-3p	-1.05907	down	1.16238	up	-3.23912	-3.32192	-3.02204	Not Detected	Not Detected	Not Detected
hsa-mir-551a	-1.05907	down	1.16238	up	-3.23912	-3.32192	-3.02204	Not Detected	Not Detected	Not Detected
hsa-mir-551b-3p	3.76042	up	1.16238	up	-3.23912	-1.32822	-3.02204	Not Detected	Detected	Not Detected
hsa-mir-551b-5p	-1.05907	down	1.16238	up	-3.23912	-3.32192	-3.02204	Not Detected	Not Detected	Not Detected
hsa-mir-552	-1.05907	down	1.16238	up	-3.23912	-3.32192	-3.02204	Not Detected	Not Detected	Not Detected
hsa-mir-553	-1.05907	down	1.16238	up	-3.23912	-3.32192	-3.02204	Not Detected	Not Detected	Not Detected
hsa-mir-554	-1.05907	down	1.16238	up	-3.23912	-3.32192	-3.02204	Not Detected	Not Detected	Not Detected
hsa-mir-555	-1.05907	down	1.16238	up	-3.23912	-3.32192	-3.02204	Not Detected	Not Detected	Not Detected
hsa-mir-556-3p	-1.05907	down	1.16238	up	-3.23912	-3.32192	-3.02204	Not Detected	Not Detected	Not Detected
hsa-mir-556-5p	-1.05907	down	1.16238	up	-3.23912	-3.32192	-3.02204	Not Detected	Not Detected	Not Detected
hsa-mir-557	-1.05907	down	1.16238	up	-3.23912	-3.32192	-3.02204	Not Detected	Not Detected	Not Detected
hsa-mir-558	-1.05907	down	1.16238	up	-3.23912	-3.32192	-3.02204	Not Detected	Not Detected	Not Detected
hsa-mir-559	-1.05907	down	1.16238	up	-3.23912	-3.32192	-3.02204	Not Detected	Not Detected	Not Detected
hsa-mir-561-3p	-1.05907	down	1.16238	up	-3.23912	-3.32192	-3.02204	Not Detected	Not Detected	Not Detected
hsa-mir-561-5p	-1.05907	down	1.16238	up	-3.23912	-3.32192	-3.02204	Not Detected	Not Detected	Not Detected
hsa-mir-562	-1.05907	down	1.16238	up	-3.23912	-3.32192	-3.02204	Not Detected	Not Detected	Not Detected
hsa-mir-563	-1.05907	down	1.16238	up	-3.23912	-3.32192	-3.02204	Not Detected	Not Detected	Not Detected
hsa-mir-564	-1.05907	down	1.16238	up	-3.23912	-3.32192	-3.02204	Not Detected	Not Detected	Not Detected
hsa-mir-566	-1.05907	down	1.16238	up	-3.23912	-3.32192	-3.02204	Not Detected	Not Detected	Not Detected
hsa-mir-567	-1.05907	down	1.16238	up	-3.23912	-3.32192	-3.02204	Not Detected	Not Detected	Not Detected
hsa-mir-568	-1.05907	down	1.16238	up	-3.23912	-3.32192	-3.02204	Not Detected	Not Detected	Not Detected
hsa-mir-569	-1.05907	down	1.16238	up	-3.23912	-3.32192	-3.02204	Not Detected	Not Detected	Not Detected
hsa-mir-570-3p	-1.05907	down	1.16238	up	-3.23912	-3.32192	-3.02204	Not Detected	Not Detected	Not Detected
hsa-mir-571	-1.05907	down	1.16238	up	-3.23912	-3.32192	-3.02204	Not Detected	Not Detected	Not Detected
hsa-mir-572	-3.44964	down	-9.46494	down	0.220558	-1.56589	-3.02204	Detected	Detected	Not Detected
hsa-mir-573	-1.05907	down	1.16238	up	-3.23912	-3.32192	-3.02204	Not Detected	Not Detected	Not Detected
hsa-mir-574-3p	-1.46273	down	15.8344	up	1.07923	0.530565	5.06422	Detected	Detected	Detected
hsa-mir-574-5p	-1.36543	down	3.41674	up	5.19917	4.74981	6.97179	Detected	Detected	Detected
hsa-mir-575	1.14986	up	-70.0323	down	3.10791	3.30937	-3.02204	Detected	Detected	Not Detected
hsa-mir-576-3p	-1.05907	down	1.16238	up	-3.23912	-3.32192	-3.02204	Not Detected	Not Detected	Not Detected
hsa-mir-576-5p	-1.05907	down	1.16238	up	-3.23912	-3.32192	-3.02204	Not Detected	Not Detected	Not Detected
hsa-mir-577	-1.05907	down	1.16238	up	-3.23912	-3.32192	-3.02204	Not Detected	Not Detected	Not Detected
hsa-mir-578	-1.05907	down	1.16238	up	-3.23912	-3.32192	-3.02204	Not Detected	Not Detected	Not Detected
hsa-mir-579	-1.05907	down	1.16238	up	-3.23912	-3.32192	-3.02204	Not Detected	Not Detected	Not Detected
hsa-mir-580	-1.05907	down	1.16238	up	-3.23912	-3.32192	-3.02204	Not Detected	Not Detected	Not Detected
hsa-mir-581	-1.05907	down	1.16238	up	-3.23912	-3.32192	-3.02204	Not Detected	Not Detected	Not Detected
hsa-mir-582-3p	-1.05907	down	1.16238	up	-3.23912	-3.32192	-3.02204	Not Detected	Not Detected	Not Detected
hsa-mir-582-5p	9.01294	up	1.16238	up	-3.23912	-0.0671194	-3.02204	Not Detected	Detected	Not Detected
hsa-mir-583	-1.05907	down	1.16238	up	-3.23912	-3.32192	-3.02204	Not Detected	Not Detected	Not Detected
hsa-mir-584-3p	-1.05907	down	1.16238	up	-3.23912	-3.32192	-3.02204	Not Detected	Not Detected	Not Detected
hsa-mir-584-5p	-1.05907	down	1.16238	up	-3.23912	-3.32192	-3.02204	Not Detected	Not Detected	Not Detected
hsa-mir-585	-1.05907	down	1.16238	up	-3.23912	-3.32192	-3.02204	Not Detected	Not Detected	Not Detected
hsa-mir-586	-1.05907	down	1.16238	up	-3.23912	-3.32192	-3.02204	Not Detected	Not Detected	Not Detected
hsa-mir-587	-1.05907	down	1.16238	up	-3.23912	-3.32192	-3.02204	Not Detected	Not Detected	Not Detected
hsa-mir-588	-1.05907	down	1.16238	up	-3.23912	-3.32192	-3.02204	Not Detected	Not Detected	Not Detected
hsa-mir-589-3p	-1.05907	down	1.16238	up	-3.23912	-3.32192	-3.02204	Not Detected	Not Detected	Not Detected
hsa-mir-589-5p	-1.05907	down	1.16238	up	-3.23912	-3.32192	-3.02204	Not Detected	Not Detected	Not Detected
hsa-mir-590-3p	-1.05907	down	1.16238	up	-3.23912	-3.32192	-3.02204	Not Detected	Not Detected	Not Detected
hsa-mir-590-5p	1.37706	up	-1.63649	down	4.88596	5.34754	4.17535	Detected	Detected	Detected
hsa-mir-591	-1.05907	down	1.16238	up	-3.23912	-3.32192	-3.02204	Not Detected	Not Detected	Not Detected
hsa-mir-592	-1.05907	down	1.16238	up	-3.23912	-3.32192	-3.02204	Not Detected	Not Detected	Not Detected
hsa-mir-593-3p	-1.05907	down	1.16238	up	-3.23912	-3.32192	-3.02204	Not Detected	Not Detected	Not Detected
hsa-mir-593-5p	-1.05907	down	1.16238	up	-3.23912	-3.32192	-3.02204	Not Detected	Not Detected	Not Detected
hsa-mir-595	-1.0101	down	5.5078	up	0.978248	0.963755	3.43972	Detected	Detected	Detected
hsa-mir-596	-1.05907	down	1.16238	up	-3.23912	-3.32192	-3.02204	Not Detected	Not Detected	Not Detected
hsa-mir-597	-1.05907	down	1.16238	up	-3.23912	-3.32192	-3.02204	Not Detected	Not Detected	Not Detected
hsa-mir-598	-3.34019	down	-9.99402	down	0.29903	-1.4409	-3.02204	Detected	Detected	Not Detected
hsa-mir-599	-1.05907	down	1.16238	up	-3.23912	-3.32192	-3.02204	Not Detected	Not Detected	Not Detected
hsa-mir-600	-1.05907	down	1.16238	up	-3.23912	-3.32192	-3.02204	Not Detected	Not Detected	Not Detected
hsa-mir-601	-1.05907	down	1.16238	up	-3.23912	-3.32192	-3.02204	Not Detected	Not Detected	Not Detected
hsa-mir-602	-1.05907	down	1.16238	up	-3.23912	-3.32192	-3.02204	Not Detected	Not Detected	Not Detected
hsa-mir-603	-1.05907	down	1.16238	up	-3.23912	-3.32192	-3.02204	Not Detected	Not Detected	Not Detected
hsa-mir-604	-1.05907	down	1.16238	up	-3.23912	-3.32192	-3.02204	Not Detected	Not Detected	Not Detected
hsa-mir-605	-1.05907	down	1.16238	up	-3.23912	-3.32192	-3.02204	Not Detected	Not Detected	Not Detected
hsa-mir-606	-1.05907	down	1.16238	up	-3.23912	-3.32192	-3.02204	Not Detected	Not Detected	Not Detected
hsa-mir-607	-1.05907	down	1.16238	up	-3.23912	-3.32192	-3.02204	Not Detected	Not Detected	Not Detected
hsa-mir-608	-1.05907	down	1.16238	up	-3.23912	-3.32192	-3.02204	Not Detected	Not Detected	Not Detected
hsa-mir-609	-1.05907	down	1.16238	up	-3.23912	-3.32192	-3.02204	Not Detected	Not Detected	Not Detected
hsa-mir-610	-1.05907	down	1.16238	up	-3.23912	-3.32192	-3.02204	Not Detected	Not Detected	Not Detected
hsa-mir-611	-1.05907	down	1.16238	up	-3.23912	-3.32192	-3.02204	Not Detected	Not Detected	Not Detected
hsa-mir-612	-1.05907	down	1.16238	up	-3.23912	-3.32192	-3.02204	Not Detected	Not Detected	Not Detected
hsa-mir-613	-1.05907	down	1.16238	up	-3.23912	-3.32192	-3.02204	Not Detected	Not Detected	Not Detected
hsa-mir-614	-1.05907	down	1.16238	up	-3.23912	-3.32192	-3.02204	Not Detected	Not Detected	Not Detected
hsa-mir-615-3p	-1.05907	down	1.16238	up	-3.23912	-3.32192	-3.02204	Not Detected	Not Detected	Not Detected
hsa-mir-615-5p	-1.05907	down	1.16238	up	-3.23912	-3.32192	-3.02204	Not Detected	Not Detected	Not Detected
hsa-mir-616-3p	-1.05907	down	1.16238	up	-3.23912	-3.32192	-3.02204	Not Detected	Not Detected	Not Detected
hsa-mir-616-5p	-1.05907	down	1.16238	up	-3.23912	-3.32192	-3.02204	Not Detected	Not Detected	Not Detected
hsa-mir-617	-1.05907	down	1.16238	up	-3.23912	-3.32192	-3.02204	Not Detected	Not Detected	Not Detected
hsa-mir-618	-1.05907	down	1.16238	up	-3.23912	-3.32192	-3.02204	Not Detected	Not Detected	Not Detected
hsa-mir-619	-1.05907	down	1.16238	up	-3.23912	-3.32192	-3.02204	Not Detected	Not Detected	Not Detected
hsa-mir-620	-1.05907	down	1.16238	up	-3.23912	-3.32192	-3.02204	Not Detected	Not Detected	Not Detected
hsa-mir-621	-1.05907	down	1.16238	up	-3.23912	-3.32192	-3.02204	Not Detected	Not Detected	Not Detected
hsa-mir-622	-1.05907	down	1.16238	up	-3.23912	-3.32192	-3.02204	Not Detected	Not Detected	Not Detected
hsa-mir-623	-1.05907	down	1.16238	up	-3.23912	-3.32192	-3.02204	Not Detected	Not Detected	Not Detected
hsa-mir-624-3p	-1.05907	down	1.16238	up	-3.23912	-3.32192	-3.02204	Not Detected	Not Detected	Not Detected
hsa-mir-624-5p	-1.05907	down	1.16238	up	-3.23912	-3.32192	-3.02204	Not Detected	Not Detected	Not Detected
hsa-mir-625-3p	-1.05907	down	1.16238	up	-3.23912	-3.32192	-3.02204	Not Detected	Not Detected	Not Detected
hsa-mir-625-5p	1.57778	up	-1.1028	down	3.13805	3.79595	2.99688	Detected	Detected	Detected
hsa-mir-626	-1.05907	down	1.16238	up	-3.23912	-3.32192	-3.02204	Not Detected	Not Detected	Not Detected
hsa-mir-627	2.65379	up	1.16238	up	-3.23912	-1.83106	-3.02204	Not Detected	Detected	Not Detected
hsa-mir-628-3p	-1.05907	down	1.16238	up	-3.23912	-3.32192	-3.02204	Not Detected	Not Detected	Not Detected
hsa-mir-628-5p	-1.05907	down	1.16238	up	-3.23912	-3.32192	-3.02204	Not Detected	Not Detected	Not Detected
hsa-mir-629-3p	2.61815	up	1.16238	up	-3.23912	-1.85057	-3.02204	Not Detected	Detected	Not Detected
hsa-mir-629-5p	-1.05907	down	1.16238	up	-3.23912	-3.32192	-3.02204	Not Detected	Not Detected	Not Detected
hsa-mir-630	-1.79712	down	1.58737	up	5.1095	4.26382	5.77614	Detected	Detected	Detected
hsa-mir-631	-1.05907	down	1.16238	up	-3.23912	-3.32192	-3.02204	Not Detected	Not Detected	Not Detected
hsa-mir-632	-1.05907	down	1.16238	up	-3.23912	-3.32192	-3.02204	Not Detected	Not Detected	Not Detected
hsa-mir-633	-1.05907	down	1.16238	up	-3.23912	-3.32192	-3.02204	Not Detected	Not Detected	Not Detected
hsa-mir-634	-1.05907	down	1.16238	up	-3.23912	-3.32192	-3.02204	Not Detected	Not Detected	Not Detected
hsa-mir-635	-1.05907	down	1.16238	up	-3.23912	-3.32192	-3.02204	Not Detected	Not Detected	Not Detected
hsa-mir-636	-1.05907	down	1.16238	up	-3.23912	-3.32192	-3.02204	Not Detected	Not Detected	Not Detected
hsa-mir-637	-1.05907	down	1.16238	up	-3.23912	-3.32192	-3.02204	Not Detected	Not Detected	Not Detected
hsa-mir-638	-1.28418	down	1.22529	up	4.83894	4.4781	5.13207	Detected	Detected	Detected
hsa-mir-639	-1.05907	down	1.16238	up	-3.23912	-3.32192	-3.02204	Not Detected	Not Detected	Not Detected
hsa-mir-640	-1.05907	down	1.16238	up	-3.23912	-3.32192	-3.02204	Not Detected	Not Detected	Not Detected
hsa-mir-641	-1.05907	down	1.16238	up	-3.23912	-3.32192	-3.02204	Not Detected	Not Detected	Not Detected
hsa-miR-642a-3p	1.08749	up	-1.3069	down	5.12157	5.24258	4.73542	Detected	Detected	Detected
hsa-miR-642a-5p	-1.05907	down	1.16238	up	-3.23912	-3.32192	-3.02204	Not Detected	Not Detected	Not Detected
hsa-mir-643	-1.05907	down	1.16238	up	-3.23912	-3.32192	-3.02204	Not Detected	Not Detected	Not Detected
hsa-miR-644a	-1.05907	down	1.16238	up	-3.23912	-3.32192	-3.02204	Not Detected	Not Detected	Not Detected
hsa-mir-645	-1.05907	down	1.16238	up	-3.23912	-3.32192	-3.02204	Not Detected	Not Detected	Not Detected
hsa-mir-646	-1.05907	down	1.16238	up	-3.23912	-3.32192	-3.02204	Not Detected	Not Detected	Not Detected
hsa-mir-647	-1.05907	down	1.16238	up	-3.23912	-3.32192	-3.02204	Not Detected	Not Detected	Not Detected
hsa-mir-648	-1.05907	down	1.16238	up	-3.23912	-3.32192	-3.02204	Not Detected	Not Detected	Not Detected
hsa-mir-650	-1.05907	down	1.16238	up	-3.23912	-3.32192	-3.02204	Not Detected	Not Detected	Not Detected
hsa-mir-651	-1.05907	down	1.16238	up	-3.23912	-3.32192	-3.02204	Not Detected	Not Detected	Not Detected
hsa-mir-652-3p	1.04833	up	-16.565	down	1.02803	1.09613	-3.02204	Detected	Detected	Not Detected
hsa-mir-652-5p	-1.05907	down	1.16238	up	-3.23912	-3.32192	-3.02204	Not Detected	Not Detected	Not Detected
hsa-mir-653	-1.05907	down	1.16238	up	-3.23912	-3.32192	-3.02204	Not Detected	Not Detected	Not Detected
hsa-mir-654-3p	-1.05907	down	1.16238	up	-3.23912	-3.32192	-3.02204	Not Detected	Not Detected	Not Detected
hsa-mir-654-5p	-1.05907	down	1.16238	up	-3.23912	-3.32192	-3.02204	Not Detected	Not Detected	Not Detected
hsa-mir-655	-1.05907	down	1.16238	up	-3.23912	-3.32192	-3.02204	Not Detected	Not Detected	Not Detected
hsa-mir-656	-1.05907	down	1.16238	up	-3.23912	-3.32192	-3.02204	Not Detected	Not Detected	Not Detected
hsa-mir-657	-1.05907	down	1.16238	up	-3.23912	-3.32192	-3.02204	Not Detected	Not Detected	Not Detected
hsa-mir-658	-1.05907	down	1.16238	up	-3.23912	-3.32192	-3.02204	Not Detected	Not Detected	Not Detected
hsa-mir-659-3p	-1.05907	down	1.16238	up	-3.23912	-3.32192	-3.02204	Not Detected	Not Detected	Not Detected
hsa-mir-659-5p	-1.05907	down	1.16238	up	-3.23912	-3.32192	-3.02204	Not Detected	Not Detected	Not Detected
hsa-mir-660-3p	-1.05907	down	1.16238	up	-3.23912	-3.32192	-3.02204	Not Detected	Not Detected	Not Detected
hsa-mir-660-5p	1.12105	up	-1.82471	down	4.01628	4.18113	3.14861	Detected	Detected	Detected
hsa-mir-661	-1.05907	down	1.16238	up	-3.23912	-3.32192	-3.02204	Not Detected	Not Detected	Not Detected
hsa-mir-662	-1.05907	down	1.16238	up	-3.23912	-3.32192	-3.02204	Not Detected	Not Detected	Not Detected
hsa-miR-663a	-3.16431	down	-9.6417	down	0.247253	-1.41464	-3.02204	Detected	Detected	Not Detected
hsa-mir-663b	-1.05907	down	1.16238	up	-3.23912	-3.32192	-3.02204	Not Detected	Not Detected	Not Detected
hsa-miR-664a-3p	-1.19342	down	-18.2633	down	1.16884	0.913735	-3.02204	Detected	Detected	Not Detected
hsa-miR-664a-5p	3.11076	up	1.16238	up	-3.23912	-1.60185	-3.02204	Not Detected	Detected	Not Detected
hsa-mir-665	-1.05907	down	1.16238	up	-3.23912	-3.32192	-3.02204	Not Detected	Not Detected	Not Detected
hsa-mir-668	-1.05907	down	1.16238	up	-3.23912	-3.32192	-3.02204	Not Detected	Not Detected	Not Detected
hsa-mir-671-3p	-1.05907	down	1.16238	up	-3.23912	-3.32192	-3.02204	Not Detected	Not Detected	Not Detected
hsa-mir-671-5p	-1.05907	down	1.16238	up	-3.23912	-3.32192	-3.02204	Not Detected	Not Detected	Not Detected
hsa-mir-675-3p	-1.05907	down	1.16238	up	-3.23912	-3.32192	-3.02204	Not Detected	Not Detected	Not Detected
hsa-mir-675-5p	-1.05907	down	1.16238	up	-3.23912	-3.32192	-3.02204	Not Detected	Not Detected	Not Detected
hsa-mir-708-3p	-1.05907	down	1.16238	up	-3.23912	-3.32192	-3.02204	Not Detected	Not Detected	Not Detected
hsa-mir-708-5p	-1.05907	down	1.16238	up	-3.23912	-3.32192	-3.02204	Not Detected	Not Detected	Not Detected
hsa-mir-744-3p	-1.05907	down	1.16238	up	-3.23912	-3.32192	-3.02204	Not Detected	Not Detected	Not Detected
hsa-mir-744-5p	-1.05907	down	1.16238	up	-3.23912	-3.32192	-3.02204	Not Detected	Not Detected	Not Detected
hsa-mir-758-3p	-1.05907	down	1.16238	up	-3.23912	-3.32192	-3.02204	Not Detected	Not Detected	Not Detected
hsa-mir-758-5p	-1.05907	down	1.16238	up	-3.23912	-3.32192	-3.02204	Not Detected	Not Detected	Not Detected
hsa-mir-7-5p	1.1448	up	-13.8104	down	0.765648	0.960744	-3.02204	Detected	Detected	Not Detected
hsa-mir-760	-1.05907	down	1.16238	up	-3.23912	-3.32192	-3.02204	Not Detected	Not Detected	Not Detected
hsa-mir-765	-1.05907	down	1.16238	up	-3.23912	-3.32192	-3.02204	Not Detected	Not Detected	Not Detected
hsa-mir-766-3p	-3.83833	down	1.34693	up	3.12644	1.18596	3.55612	Detected	Detected	Detected
hsa-mir-766-5p	-1.05907	down	1.16238	up	-3.23912	-3.32192	-3.02204	Not Detected	Not Detected	Not Detected
hsa-mir-767-3p	-1.05907	down	1.16238	up	-3.23912	-3.32192	-3.02204	Not Detected	Not Detected	Not Detected
hsa-mir-767-5p	-1.05907	down	1.16238	up	-3.23912	-3.32192	-3.02204	Not Detected	Not Detected	Not Detected
hsa-mir-769-3p	-1.05907	down	1.16238	up	-3.23912	-3.32192	-3.02204	Not Detected	Not Detected	Not Detected
hsa-mir-769-5p	1.05017	up	-12.3059	down	0.599241	0.669861	-3.02204	Detected	Detected	Not Detected
hsa-mir-770-5p	-1.05907	down	1.16238	up	-3.23912	-3.32192	-3.02204	Not Detected	Not Detected	Not Detected
hsa-mir-802	-1.05907	down	1.16238	up	-3.23912	-3.32192	-3.02204	Not Detected	Not Detected	Not Detected
hsa-mir-873-3p	-1.05907	down	1.16238	up	-3.23912	-3.32192	-3.02204	Not Detected	Not Detected	Not Detected
hsa-mir-873-5p	-2.90547	down	-7.17905	down	-0.178242	-1.71701	-3.02204	Detected	Detected	Not Detected
hsa-mir-874	-1.2419	down	-12.4116	down	0.611578	0.29903	-3.02204	Detected	Detected	Not Detected
hsa-mir-875-3p	-1.05907	down	1.16238	up	-3.23912	-3.32192	-3.02204	Not Detected	Not Detected	Not Detected
hsa-mir-875-5p	-1.05907	down	1.16238	up	-3.23912	-3.32192	-3.02204	Not Detected	Not Detected	Not Detected
hsa-mir-876-3p	-1.05907	down	1.16238	up	-3.23912	-3.32192	-3.02204	Not Detected	Not Detected	Not Detected
hsa-mir-876-5p	-1.05907	down	1.16238	up	-3.23912	-3.32192	-3.02204	Not Detected	Not Detected	Not Detected
hsa-mir-877-3p	-1.05907	down	1.16238	up	-3.23912	-3.32192	-3.02204	Not Detected	Not Detected	Not Detected
hsa-mir-877-5p	-1.05907	down	1.16238	up	-3.23912	-3.32192	-3.02204	Not Detected	Not Detected	Not Detected
hsa-mir-885-3p	3.27777	up	52.0539	up	-3.23912	-1.5264	2.46282	Not Detected	Detected	Detected
hsa-mir-885-5p	-1.05907	down	1.16238	up	-3.23912	-3.32192	-3.02204	Not Detected	Not Detected	Not Detected
hsa-mir-887	-1.05907	down	1.16238	up	-3.23912	-3.32192	-3.02204	Not Detected	Not Detected	Not Detected
hsa-mir-888-3p	-1.05907	down	1.16238	up	-3.23912	-3.32192	-3.02204	Not Detected	Not Detected	Not Detected
hsa-mir-888-5p	-1.05907	down	1.16238	up	-3.23912	-3.32192	-3.02204	Not Detected	Not Detected	Not Detected
hsa-mir-889	-1.05907	down	1.16238	up	-3.23912	-3.32192	-3.02204	Not Detected	Not Detected	Not Detected
hsa-mir-890	-1.05907	down	1.16238	up	-3.23912	-3.32192	-3.02204	Not Detected	Not Detected	Not Detected
hsa-mir-891a	-1.05907	down	1.16238	up	-3.23912	-3.32192	-3.02204	Not Detected	Not Detected	Not Detected
hsa-mir-891b	-1.05907	down	1.16238	up	-3.23912	-3.32192	-3.02204	Not Detected	Not Detected	Not Detected
hsa-mir-892a	-1.05907	down	1.16238	up	-3.23912	-3.32192	-3.02204	Not Detected	Not Detected	Not Detected
hsa-mir-892b	-1.05907	down	1.16238	up	-3.23912	-3.32192	-3.02204	Not Detected	Not Detected	Not Detected
hsa-mir-920	-1.05907	down	1.16238	up	-3.23912	-3.32192	-3.02204	Not Detected	Not Detected	Not Detected
hsa-mir-921	-1.05907	down	1.16238	up	-3.23912	-3.32192	-3.02204	Not Detected	Not Detected	Not Detected
hsa-mir-922	-1.05907	down	1.16238	up	-3.23912	-3.32192	-3.02204	Not Detected	Not Detected	Not Detected
hsa-mir-924	-1.05907	down	1.16238	up	-3.23912	-3.32192	-3.02204	Not Detected	Not Detected	Not Detected
hsa-mir-92a-3p	-1.08009	down	-1.19991	down	6.73169	6.62054	6.46877	Detected	Detected	Detected
hsa-mir-92b-3p	-1.05907	down	1.16238	up	-3.23912	-3.32192	-3.02204	Not Detected	Not Detected	Not Detected
hsa-mir-92b-5p	-1.05907	down	1.16238	up	-3.23912	-3.32192	-3.02204	Not Detected	Not Detected	Not Detected
hsa-mir-933	-1.05907	down	1.16238	up	-3.23912	-3.32192	-3.02204	Not Detected	Not Detected	Not Detected
hsa-mir-93-3p	-1.05907	down	1.16238	up	-3.23912	-3.32192	-3.02204	Not Detected	Not Detected	Not Detected
hsa-mir-934	-1.05907	down	1.16238	up	-3.23912	-3.32192	-3.02204	Not Detected	Not Detected	Not Detected
hsa-mir-935	-1.05907	down	1.16238	up	-3.23912	-3.32192	-3.02204	Not Detected	Not Detected	Not Detected
hsa-mir-93-5p	1.07817	up	-2.14467	down	4.86943	4.97802	3.76867	Detected	Detected	Detected
hsa-mir-936	-1.05907	down	1.16238	up	-3.23912	-3.32192	-3.02204	Not Detected	Not Detected	Not Detected
hsa-mir-937-3p	-1.05907	down	1.16238	up	-3.23912	-3.32192	-3.02204	Not Detected	Not Detected	Not Detected
hsa-mir-937-5p	1.0426	up	1.13582	up	3.45745	3.51763	3.64118	Detected	Detected	Detected
hsa-mir-938	-1.05907	down	1.16238	up	-3.23912	-3.32192	-3.02204	Not Detected	Not Detected	Not Detected
hsa-mir-939-3p	-1.05907	down	1.16238	up	-3.23912	-3.32192	-3.02204	Not Detected	Not Detected	Not Detected
hsa-mir-939-5p	-1.35963	down	-1.78258	down	3.5312	3.08798	2.69723	Detected	Detected	Detected
hsa-mir-9-3p	12.113	up	1.16238	up	-3.23912	0.359369	-3.02204	Not Detected	Detected	Not Detected
hsa-mir-940	-1.44717	down	1.70026	up	3.98406	3.45082	4.74981	Detected	Detected	Detected
hsa-mir-941	-1.05907	down	1.16238	up	-3.23912	-3.32192	-3.02204	Not Detected	Not Detected	Not Detected
hsa-mir-942	-1.05907	down	1.16238	up	-3.23912	-3.32192	-3.02204	Not Detected	Not Detected	Not Detected
hsa-mir-943	-1.05907	down	1.16238	up	-3.23912	-3.32192	-3.02204	Not Detected	Not Detected	Not Detected
hsa-mir-944	-1.05907	down	1.16238	up	-3.23912	-3.32192	-3.02204	Not Detected	Not Detected	Not Detected
hsa-mir-95	-3.22436	down	-10.6144	down	0.38591	-1.3031	-3.02204	Detected	Detected	Not Detected
hsa-mir-9-5p	-1.05907	down	1.16238	up	-3.23912	-3.32192	-3.02204	Not Detected	Not Detected	Not Detected
hsa-mir-96-3p	-1.05907	down	1.16238	up	-3.23912	-3.32192	-3.02204	Not Detected	Not Detected	Not Detected
hsa-mir-96-5p	-1.05907	down	1.16238	up	-3.23912	-3.32192	-3.02204	Not Detected	Not Detected	Not Detected
hsa-mir-98-3p	-1.05907	down	1.16238	up	-3.23912	-3.32192	-3.02204	Not Detected	Not Detected	Not Detected
hsa-mir-98-5p	3.86936	up	2.85811	up	1.18596	3.13805	2.70102	Detected	Detected	Detected
hsa-mir-99a-3p	-1.05907	down	1.16238	up	-3.23912	-3.32192	-3.02204	Not Detected	Not Detected	Not Detected
hsa-mir-99a-5p	-3.02141	down	-9.54301	down	0.232409	-1.36281	-3.02204	Detected	Detected	Not Detected
hsa-mir-99b-3p	-1.05907	down	1.16238	up	-3.23912	-3.32192	-3.02204	Not Detected	Not Detected	Not Detected
hsa-mir-99b-5p	-1.12307	down	-59.1665	down	2.86467	2.69723	-3.02204	Detected	Detected	Not Detected

## Sheet: TGFb-up or down regulated miRNA
miRNA name	FC ([tgfb] vs [ctrl])	Regulation ([tgfb] vs [ctrl])	ctrl.ProbeSignal(normalized)	tgfb.ProbeSignal(normalized)	ctrl.singal	tgfb.singal
hsa-mir-885-3p	52.0539	up	-3.23912	2.46282	Not Detected	Detected
hsa-mir-574-3p	15.8344	up	1.07923	5.06422	Detected	Detected
hsa-mir-1281	7.27714	up	0.190363	3.05374	Detected	Detected
hsa-mir-595	5.5078	up	0.978248	3.43972	Detected	Detected
hsa-mir-205-3p	5.03271	up	3.19318	5.52451	Detected	Detected
hsa-mir-498	4.82992	up	0.592674	2.86467	Detected	Detected
hsa-mir-1228-3p	3.70196	up	0.771251	2.65954	Detected	Detected
hsa-mir-574-5p	3.41674	up	5.19917	6.97179	Detected	Detected
hsa-mir-454-3p	3.3543	up	1.07028	2.81629	Detected	Detected
hsa-mir-301a-3p	3.15763	up	1.13538	2.79422	Detected	Detected
hsa-mir-32-3p	3.10174	up	2.76526	4.39834	Detected	Detected
hsa-mir-98-5p	2.85811	up	1.18596	2.70102	Detected	Detected
hsa-mir-940	1.70026	up	3.98406	4.74981	Detected	Detected
hsa-mir-630	1.58737	up	5.1095	5.77614	Detected	Detected
hsa-mir-142-5p	1.4601	up	7.21111	7.75718	Detected	Detected
hsa-mir-1234-5p	1.37344	up	6.62054	7.07833	Detected	Detected
hsa-mir-766-3p	1.34693	up	3.12644	3.55612	Detected	Detected
hsa-mir-1915-3p	1.3038	up	5.37449	5.75722	Detected	Detected
hsa-mir-29b-3p	1.24761	up	8.38075	8.69992	Detected	Detected
hsa-mir-638	1.22529	up	4.83894	5.13207	Detected	Detected
hsa-mir-142-3p	1.22102	up	10.9626	11.2507	Detected	Detected
hsa-mir-1229-5p	1.22046	up	3.63246	3.91989	Detected	Detected
hsa-mir-423-5p	1.19674	up	2.4225	2.68161	Detected	Detected
hsa-mir-140-5p	1.1454	up	5.88987	6.08572	Detected	Detected
hsa-mir-197-3p	1.14385	up	4.92767	5.12157	Detected	Detected
hsa-mir-937-5p	1.13582	up	3.45745	3.64118	Detected	Detected
hsa-miR-1260a	1.12307	up	8.69992	8.86736	Detected	Detected
hsa-mir-22-3p	1.09501	up	7.56062	7.69156	Detected	Detected
hsa-mir-1207-5p	1.07499	up	4.82334	4.92767	Detected	Detected
hsa-mir-1225-5p	1.06515	up	5.45116	5.54221	Detected	Detected
hsa-mir-27a-3p	1.03358	up	7.98679	8.03444	Detected	Detected
hsa-mir-320c	1.02022	up	5.83968	5.86856	Detected	Detected
hsa-mir-1290	-1.00702	down	2.74368	2.73359	Detected	Detected
hsa-miR-1268a	-1.00931	down	4.52091	4.50755	Detected	Detected
hsa-mir-15a-5p	-1.06	down	7.71397	7.62991	Detected	Detected
hsa-mir-186-5p	-1.06204	down	4.39834	4.3115	Detected	Detected
hsa-mir-146a-5p	-1.07443	down	6.97179	6.86821	Detected	Detected
hsa-mir-28-5p	-1.08765	down	4.38504	4.26382	Detected	Detected
hsa-mir-29a-3p	-1.08828	down	9.65173	9.52968	Detected	Detected
hsa-miR-451a	-1.09062	down	8.11194	7.98679	Detected	Detected
hsa-let-7b-5p	-1.09501	down	7.69156	7.56062	Detected	Detected
hsa-mir-146b-5p	-1.09651	down	7.91166	7.77874	Detected	Detected
hsa-miR-378a-3p	-1.10261	down	6.46877	6.32784	Detected	Detected
hsa-mir-625-5p	-1.1028	down	3.13805	2.99688	Detected	Detected
hsa-mir-342-3p	-1.10633	down	9.32127	9.17548	Detected	Detected
hsa-mir-30c-5p	-1.12212	down	5.86856	5.70233	Detected	Detected
hsa-mir-320d	-1.12811	down	6.22125	6.04734	Detected	Detected
hsa-let-7f-5p	-1.12874	down	9.09206	8.91735	Detected	Detected
hsa-mir-223-3p	-1.13421	down	9.436	9.25431	Detected	Detected
hsa-let-7d-5p	-1.14468	down	6.92663	6.73169	Detected	Detected
hsa-mir-16-5p	-1.15541	down	9.52968	9.32127	Detected	Detected
hsa-mir-23a-3p	-1.15638	down	8.03444	7.82482	Detected	Detected
hsa-mir-197-5p	-1.15951	down	4.59856	4.38504	Detected	Detected
hsa-mir-342-5p	-1.16849	down	6.14475	5.9201	Detected	Detected
hsa-mir-15b-5p	-1.18496	down	8.35678	8.11194	Detected	Detected
hsa-mir-101-3p	-1.1954	down	5.9201	5.66261	Detected	Detected
hsa-mir-181a-5p	-1.19849	down	6.50249	6.24128	Detected	Detected
hsa-mir-92a-3p	-1.19991	down	6.73169	6.46877	Detected	Detected
hsa-mir-155-5p	-1.20584	down	7.19667	6.92663	Detected	Detected
hsa-let-7a-5p	-1.21726	down	9.25431	8.97068	Detected	Detected
hsa-mir-26b-5p	-1.22572	down	8.97068	8.67705	Detected	Detected
hsa-mir-29c-3p	-1.25029	down	8.54715	8.22488	Detected	Detected
hsa-mir-1202	-1.2547	down	4.97802	4.65067	Detected	Detected
hsa-let-7e-5p	-1.26963	down	5.7189	5.37449	Detected	Detected
hsa-mir-125a-5p	-1.28792	down	4.50755	4.1425	Detected	Detected
hsa-mir-106b-5p	-1.28852	down	6.86821	6.50249	Detected	Detected
hsa-let-7i-5p	-1.29253	down	8.91735	8.54715	Detected	Detected
hsa-mir-361-3p	-1.30665	down	3.47386	3.08798	Detected	Detected
hsa-mir-1246	-1.30672	down	5.85697	5.47102	Detected	Detected
hsa-miR-642a-3p	-1.3069	down	5.12157	4.73542	Detected	Detected
hsa-mir-24-3p	-1.30739	down	7.82482	7.43813	Detected	Detected
hsa-let-7c	-1.30796	down	4.56844	4.18113	Detected	Detected
hsa-mir-20a-5p	-1.30984	down	8.30105	7.91166	Detected	Detected
hsa-mir-107	-1.32318	down	7.02455	6.62054	Detected	Detected
hsa-mir-494	-1.33108	down	5.03665	4.62405	Detected	Detected
hsa-mir-30e-5p	-1.36807	down	6.08572	5.63357	Detected	Detected
hsa-mir-26a-5p	-1.39493	down	7.75718	7.27698	Detected	Detected
hsa-mir-1275	-1.40557	down	4.31401	3.82285	Detected	Detected
hsa-mir-30b-5p	-1.42035	down	7.07833	6.57208	Detected	Detected
hsa-mir-19b-3p	-1.42462	down	8.86736	8.35678	Detected	Detected
hsa-mir-338-3p	-1.42954	down	4.3115	3.79595	Detected	Detected
hsa-mir-19a-3p	-1.43352	down	6.68092	6.16135	Detected	Detected
hsa-mir-34a-5p	-1.43632	down	6.24128	5.7189	Detected	Detected
hsa-mir-30d-5p	-1.45485	down	5.54221	5.00134	Detected	Detected
hsa-miR-103a-3p	-1.47259	down	7.5829	7.02455	Detected	Detected
hsa-mir-21-5p	-1.48158	down	12.7916	12.2244	Detected	Detected
hsa-mir-25-3p	-1.51637	down	6.82187	6.22125	Detected	Detected
hsa-mir-324-3p	-1.52748	down	5.13207	4.52091	Detected	Detected
hsa-mir-320b	-1.54324	down	5.66261	5.03665	Detected	Detected
hsa-mir-23b-3p	-1.54472	down	3.52174	2.8944	Detected	Detected
hsa-mir-27b-3p	-1.54536	down	3.39321	2.76526	Detected	Detected
hsa-mir-331-3p	-1.54768	down	5.49953	4.86943	Detected	Detected
hsa-mir-363-3p	-1.58003	down	5.24258	4.58263	Detected	Detected
hsa-mir-17-5p	-1.6046	down	6.57208	5.88987	Detected	Detected
hsa-mir-361-5p	-1.6116	down	4.0817	3.39321	Detected	Detected
hsa-mir-590-5p	-1.63649	down	4.88596	4.17535	Detected	Detected
hsa-let-7g-5p	-1.65114	down	10.5854	9.86194	Detected	Detected
hsa-miR-151a-5p	-1.65236	down	4.17535	3.45082	Detected	Detected
hsa-mir-320a	-1.67736	down	4.26382	3.51763	Detected	Detected
hsa-mir-181b-5p	-1.70392	down	4.22631	3.45745	Detected	Detected
hsa-mir-424-5p	-1.70994	down	3.51763	2.74368	Detected	Detected
hsa-mir-20b-5p	-1.76097	down	5.70233	4.88596	Detected	Detected
hsa-mir-939-5p	-1.78258	down	3.5312	2.69723	Detected	Detected
hsa-mir-374a-5p	-1.78746	down	5.06422	4.22631	Detected	Detected
hsa-mir-140-3p	-1.80714	down	5.96321	5.1095	Detected	Detected
hsa-mir-660-5p	-1.82471	down	4.01628	3.14861	Detected	Detected
hsa-mir-192-5p	-1.92325	down	4.65067	3.70713	Detected	Detected
hsa-mir-21-3p	-1.93623	down	4.07133	3.11808	Detected	Detected
hsa-mir-185-5p	-1.97878	down	4.09252	3.10791	Detected	Detected
hsa-mir-31-5p	-2.09928	down	3.79595	2.72605	Detected	Detected
hsa-mir-210	-2.13788	down	3.91989	2.8237	Detected	Detected
hsa-mir-93-5p	-2.14467	down	4.86943	3.76867	Detected	Detected
hsa-mir-132-3p	-2.14656	down	4.4114	3.30937	Detected	Detected
hsa-mir-148a-3p	-2.18865	down	4.29621	3.16617	Detected	Detected
hsa-mir-150-5p	-2.3972	down	11.8468	10.5854	Detected	Detected
hsa-mir-425-5p	-2.65179	down	4.73542	3.32846	Detected	Detected
hsa-mir-505-5p	-7.17905	down	-0.178242	-3.02204	Detected	Not Detected
hsa-mir-873-5p	-7.17905	down	-0.178242	-3.02204	Detected	Not Detected
hsa-miR-371a-5p	-7.17905	down	-0.178242	-3.02204	Detected	Not Detected
hsa-mir-135a-3p	-7.90014	down	-0.0401574	-3.02204	Detected	Not Detected
hsa-mir-141-3p	-8.94832	down	0.139581	-3.02204	Detected	Not Detected
hsa-mir-196b-5p	-9.29842	down	0.19495	-3.02204	Detected	Not Detected
hsa-mir-340-5p	-9.44616	down	0.217692	-3.02204	Detected	Not Detected
hsa-mir-572	-9.46494	down	0.220558	-3.02204	Detected	Not Detected
hsa-mir-99a-5p	-9.54301	down	0.232409	-3.02204	Detected	Not Detected
hsa-miR-663a	-9.6417	down	0.247253	-3.02204	Detected	Not Detected
hsa-mir-199b-5p	-9.81175	down	0.272475	-3.02204	Detected	Not Detected
hsa-mir-598	-9.99402	down	0.29903	-3.02204	Detected	Not Detected
hsa-mir-32-5p	-10.1219	down	0.317379	-3.02204	Detected	Not Detected
hsa-mir-1234-3p	-10.2254	down	0.332053	-3.02204	Detected	Not Detected
hsa-mir-132-5p	-10.4209	down	0.359369	-3.02204	Detected	Not Detected
hsa-mir-33b-3p	-10.5512	down	0.377306	-3.02204	Detected	Not Detected
hsa-mir-150-3p	-10.5668	down	0.379431	-3.02204	Detected	Not Detected
hsa-mir-95	-10.6144	down	0.38591	-3.02204	Detected	Not Detected
hsa-miR-500a-3p	-10.8678	down	0.419953	-3.02204	Detected	Not Detected
hsa-mir-33a-5p	-11.1973	down	0.46304	-3.02204	Detected	Not Detected
hsa-mir-10a-5p	-11.4823	down	0.499302	-3.02204	Detected	Not Detected
hsa-mir-199a-3p	-11.6091	down	0.515154	-3.02204	Detected	Not Detected
hsa-mir-505-3p	-11.7338	down	0.530565	-3.02204	Detected	Not Detected
hsa-mir-340-3p	-11.8063	down	0.539452	-3.02204	Detected	Not Detected
hsa-mir-484	-11.8972	down	0.550512	-3.02204	Detected	Not Detected
hsa-mir-483-5p	-11.9975	down	0.562629	-3.02204	Detected	Not Detected
hsa-mir-181d	-12.0914	down	0.573875	-3.02204	Detected	Not Detected
hsa-mir-502-3p	-12.1687	down	0.583069	-3.02204	Detected	Not Detected
hsa-mir-769-5p	-12.3059	down	0.599241	-3.02204	Detected	Not Detected
hsa-mir-874	-12.4116	down	0.611578	-3.02204	Detected	Not Detected
hsa-mir-18b-5p	-12.9232	down	0.669861	-3.02204	Detected	Not Detected
hsa-mir-195-5p	-13.0495	down	0.68389	-3.02204	Detected	Not Detected
hsa-mir-29c-5p	-13.2568	down	0.706629	-3.02204	Detected	Not Detected
hsa-mir-1973	-13.4348	down	0.725869	-3.02204	Detected	Not Detected
hsa-mir-20a-3p	-13.5621	down	0.739474	-3.02204	Detected	Not Detected
hsa-mir-7-5p	-13.8104	down	0.765648	-3.02204	Detected	Not Detected
hsa-mir-188-5p	-14.122	down	0.797833	-3.02204	Detected	Not Detected
hsa-mir-128	-14.2845	down	0.814345	-3.02204	Detected	Not Detected
hsa-mir-532-3p	-14.7012	down	0.855831	-3.02204	Detected	Not Detected
hsa-mir-125b-5p	-14.9788	down	0.882813	-3.02204	Detected	Not Detected
hsa-mir-212-3p	-15.0143	down	0.886232	-3.02204	Detected	Not Detected
hsa-mir-193b-3p	-15.1697	down	0.901084	-3.02204	Detected	Not Detected
hsa-mir-362-3p	-15.3033	down	0.913735	-3.02204	Detected	Not Detected
hsa-mir-193a-3p	-15.8432	down	0.963755	-3.02204	Detected	Not Detected
hsa-mir-194-5p	-16.3083	down	1.0055	-3.02204	Detected	Not Detected
hsa-mir-652-3p	-16.565	down	1.02803	-3.02204	Detected	Not Detected
hsa-mir-17-3p	-17.3656	down	1.09613	-3.02204	Detected	Not Detected
hsa-mir-181c-5p	-17.4541	down	1.10346	-3.02204	Detected	Not Detected
hsa-mir-148b-3p	-17.5802	down	1.11384	-3.02204	Detected	Not Detected
hsa-mir-532-5p	-17.7839	down	1.13046	-3.02204	Detected	Not Detected
hsa-mir-513a-5p	-17.9354	down	1.1427	-3.02204	Detected	Not Detected
hsa-mir-362-5p	-18.015	down	1.14909	-3.02204	Detected	Not Detected
hsa-miR-664a-3p	-18.2633	down	1.16884	-3.02204	Detected	Not Detected
hsa-mir-215	-18.5058	down	1.18787	-3.02204	Detected	Not Detected
hsa-mir-211-3p	-18.6107	down	1.19602	-3.02204	Detected	Not Detected
hsa-mir-31-3p	-44.7822	down	2.46282	-3.02204	Detected	Not Detected
hsa-mir-1305	-52.1156	down	2.68161	-3.02204	Detected	Not Detected
hsa-mir-126-3p	-52.6829	down	2.69723	-3.02204	Detected	Not Detected
hsa-mir-222-3p	-53.7461	down	2.72605	-3.02204	Detected	Not Detected
hsa-mir-324-5p	-55.803	down	2.78024	-3.02204	Detected	Not Detected
hsa-mir-486-5p	-57.2153	down	2.81629	-3.02204	Detected	Not Detected
hsa-mir-99b-5p	-59.1665	down	2.86467	-3.02204	Detected	Not Detected
hsa-mir-221-3p	-63.413	down	2.96467	-3.02204	Detected	Not Detected
hsa-mir-18a-5p	-67.4511	down	3.05374	-3.02204	Detected	Not Detected
hsa-mir-30e-3p	-69.0716	down	3.08798	-3.02204	Detected	Not Detected
hsa-mir-575	-70.0323	down	3.10791	-3.02204	Detected	Not Detected
hsa-miR-365a-3p	-72.918	down	3.16617	-3.02204	Detected	Not Detected
hsa-mir-130a-3p	-80.5275	down	3.30937	-3.02204	Detected	Not Detected
hsa-mir-130b-3p	-88.8226	down	3.45082	-3.02204	Detected	Not Detected
hsa-mir-374b-5p	-143.463	down	4.1425	-3.02204	Detected	Not Detected
		Note：
			Up-reulated
			Down-regulated
			No change

## Sheet: LPS-up or down regulated miRNAs
miRNA name	FC ([lps] vs [ctrl])	Regulation ([lps] vs [ctrl])	ctrl.ProbeSignal(normalized)	lps.ProbeSignal(normalized)	ctrl.singal	lps.singal
hsa-mir-144-3p	64.8643	up	-3.23912	2.78024	Not Detected	Detected
hsa-mir-34b-5p	12.2826	up	-3.23912	0.379431	Not Detected	Detected
hsa-mir-1233-1-5p	12.2008	up	-3.23912	0.369787	Not Detected	Detected
hsa-mir-9-3p	12.113	up	-3.23912	0.359369	Not Detected	Detected
hsa-mir-1181	11.8759	up	-3.23912	0.330843	Not Detected	Detected
hsa-mir-134	11.0926	up	-3.23912	0.232409	Not Detected	Detected
hsa-mir-1914-3p	11.0177	up	-3.23912	0.222638	Not Detected	Detected
hsa-mir-1306-3p	10.4013	up	-3.23912	0.139581	Not Detected	Detected
hsa-mir-582-5p	9.01294	up	-3.23912	-0.0671194	Not Detected	Detected
hsa-mir-301a-3p	4.57281	up	1.13538	3.32846	Detected	Detected
hsa-mir-98-5p	3.86936	up	1.18596	3.13805	Detected	Detected
hsa-mir-551b-3p	3.76042	up	-3.23912	-1.32822	Not Detected	Detected
hsa-mir-125a-3p	3.70023	up	-3.23912	-1.3515	Not Detected	Detected
hsa-mir-155-3p	3.63586	up	-3.23912	-1.37682	Not Detected	Detected
hsa-mir-193a-3p	3.62994	up	0.963755	2.8237	Detected	Detected
hsa-mir-221-5p	3.54213	up	-3.23912	-1.4145	Not Detected	Detected
hsa-mir-215	3.50402	up	1.18787	2.99688	Detected	Detected
hsa-mir-532-5p	3.39624	up	1.13046	2.8944	Detected	Detected
hsa-miR-151a-3p	3.38774	up	-3.23912	-1.47879	Not Detected	Detected
hsa-mir-1228-5p	3.34384	up	-3.23912	-1.49761	Not Detected	Detected
hsa-mir-194-5p	3.3129	up	1.0055	2.73359	Detected	Detected
hsa-mir-181a-3p	3.30269	up	-3.23912	-1.51548	Not Detected	Detected
hsa-mir-17-3p	3.29475	up	1.09613	2.81629	Detected	Detected
hsa-mir-362-5p	3.28429	up	1.14909	2.86467	Detected	Detected
hsa-mir-885-3p	3.27777	up	-3.23912	-1.5264	Not Detected	Detected
hsa-mir-330-3p	3.27336	up	-3.23912	-1.52834	Not Detected	Detected
hsa-mir-200c-3p	3.24727	up	-3.23912	-1.53989	Not Detected	Detected
hsa-mir-1180	3.22714	up	-3.23912	-1.54886	Not Detected	Detected
hsa-mir-30a-5p	3.22001	up	-3.23912	-1.55205	Not Detected	Detected
hsa-mir-144-5p	3.20934	up	-3.23912	-1.55684	Not Detected	Detected
hsa-mir-502-5p	3.18509	up	-3.23912	-1.56778	Not Detected	Detected
hsa-mir-181c-3p	3.17442	up	-3.23912	-1.57262	Not Detected	Detected
hsa-miR-664a-5p	3.11076	up	-3.23912	-1.60185	Not Detected	Detected
hsa-mir-181c-5p	3.07928	up	1.10346	2.72605	Detected	Detected
hsa-mir-200b-3p	3.03826	up	-3.23912	-1.63587	Not Detected	Detected
hsa-mir-100-5p	3.00685	up	-3.23912	-1.65086	Not Detected	Detected
hsa-mir-449a	2.99946	up	-3.23912	-1.65441	Not Detected	Detected
hsa-miR-378a-5p	2.99263	up	-3.23912	-1.6577	Not Detected	Detected
hsa-mir-30b-3p	2.96928	up	-3.23912	-1.66901	Not Detected	Detected
hsa-mir-1271-5p	2.95858	up	-3.23912	-1.67421	Not Detected	Detected
hsa-mir-487b	2.94978	up	-3.23912	-1.67851	Not Detected	Detected
hsa-mir-206	2.94774	up	-3.23912	-1.67951	Not Detected	Detected
hsa-mir-424-3p	2.91717	up	-3.23912	-1.69454	Not Detected	Detected
hsa-mir-520f	2.91656	up	-3.23912	-1.69485	Not Detected	Detected
hsa-mir-362-3p	2.84567	up	0.913735	2.4225	Detected	Detected
hsa-mir-486-3p	2.70749	up	-3.23912	-1.80216	Not Detected	Detected
hsa-miR-500a-5p	2.68249	up	-3.23912	-1.81554	Not Detected	Detected
hsa-mir-627	2.65379	up	-3.23912	-1.83106	Not Detected	Detected
hsa-mir-629-3p	2.61815	up	-3.23912	-1.85057	Not Detected	Detected
hsa-mir-223-5p	2.59991	up	-3.23912	-1.86066	Not Detected	Detected
hsa-mir-29a-5p	2.53448	up	-3.23912	-1.89743	Not Detected	Detected
hsa-mir-142-3p	2.39794	up	10.9626	12.2244	Detected	Detected
hsa-mir-301b	2.38708	up	-3.23912	-1.98387	Not Detected	Detected
hsa-mir-126-3p	1.87005	up	2.69723	3.6003	Detected	Detected
hsa-mir-29b-3p	1.73476	up	8.38075	9.17548	Detected	Detected
hsa-mir-142-5p	1.62512	up	7.21111	7.91166	Detected	Detected
hsa-mir-625-5p	1.57778	up	3.13805	3.79595	Detected	Detected
hsa-mir-155-5p	1.497	up	7.19667	7.77874	Detected	Detected
hsa-mir-101-3p	1.46273	up	5.9201	6.46877	Detected	Detected
hsa-mir-340-5p	1.46201	up	0.217692	0.765648	Detected	Detected
hsa-mir-494	1.43972	up	5.03665	5.56243	Detected	Detected
hsa-mir-130a-3p	1.42749	up	3.30937	3.82285	Detected	Detected
hsa-mir-338-3p	1.40259	up	4.3115	4.79959	Detected	Detected
hsa-mir-192-5p	1.38597	up	4.65067	5.12157	Detected	Detected
hsa-mir-590-5p	1.37706	up	4.88596	5.34754	Detected	Detected
hsa-mir-28-5p	1.36974	up	4.38504	4.83894	Detected	Detected
hsa-mir-16-5p	1.36881	up	9.52968	9.9826	Detected	Detected
hsa-mir-361-3p	1.36228	up	3.47386	3.91989	Detected	Detected
hsa-mir-29a-3p	1.35797	up	9.65173	10.0932	Detected	Detected
hsa-mir-148a-3p	1.35586	up	4.29621	4.73542	Detected	Detected
hsa-mir-32-5p	1.33079	up	0.317379	0.729664	Detected	Detected
hsa-mir-20a-3p	1.31915	up	0.739474	1.13909	Detected	Detected
hsa-mir-505-5p	1.31841	up	-0.178242	0.220558	Detected	Detected
hsa-mir-374a-5p	1.30762	up	5.06422	5.45116	Detected	Detected
hsa-mir-10a-5p	1.30761	up	0.499302	0.886232	Detected	Detected
hsa-mir-150-3p	1.29503	up	0.379431	0.752412	Detected	Detected
hsa-mir-140-5p	1.27581	up	5.88987	6.24128	Detected	Detected
hsa-mir-23b-3p	1.27156	up	3.52174	3.86834	Detected	Detected
hsa-miR-451a	1.27128	up	8.11194	8.45822	Detected	Detected
hsa-mir-19a-3p	1.26895	up	6.68092	7.02455	Detected	Detected
hsa-mir-15b-5p	1.26851	up	8.35678	8.69992	Detected	Detected
hsa-mir-33a-5p	1.2612	up	0.46304	0.797833	Detected	Detected
hsa-miR-151a-5p	1.25893	up	4.17535	4.50755	Detected	Detected
hsa-mir-106b-5p	1.25567	up	6.86821	7.19667	Detected	Detected
hsa-mir-21-3p	1.25441	up	4.07133	4.39834	Detected	Detected
hsa-let-7c	1.24618	up	4.56844	4.88596	Detected	Detected
hsa-mir-222-3p	1.23685	up	2.72605	3.03272	Detected	Detected
hsa-mir-212-3p	1.23255	up	0.886232	1.18787	Detected	Detected
hsa-mir-425-5p	1.23219	up	4.73542	5.03665	Detected	Detected
hsa-mir-31-5p	1.21905	up	3.79595	4.0817	Detected	Detected
hsa-let-7g-5p	1.21568	up	10.5854	10.8672	Detected	Detected
hsa-mir-128	1.20154	up	0.814345	1.07923	Detected	Detected
hsa-mir-34a-5p	1.19849	up	6.24128	6.50249	Detected	Detected
hsa-mir-130b-3p	1.19442	up	3.45082	3.70713	Detected	Detected
hsa-mir-186-5p	1.19113	up	4.39834	4.65067	Detected	Detected
hsa-mir-424-5p	1.19006	up	3.51763	3.76867	Detected	Detected
hsa-mir-181d	1.18929	up	0.573875	0.823972	Detected	Detected
hsa-mir-205-3p	1.18636	up	3.19318	3.43972	Detected	Detected
hsa-mir-20a-5p	1.186	up	8.30105	8.54715	Detected	Detected
hsa-let-7f-5p	1.1722	up	9.09206	9.32127	Detected	Detected
hsa-mir-363-3p	1.17156	up	5.24258	5.47102	Detected	Detected
hsa-mir-181b-5p	1.16772	up	4.22631	4.45001	Detected	Detected
hsa-mir-331-3p	1.16422	up	5.49953	5.7189	Detected	Detected
hsa-mir-223-3p	1.16129	up	9.436	9.65173	Detected	Detected
hsa-mir-575	1.14986	up	3.10791	3.30937	Detected	Detected
hsa-mir-146b-5p	1.14892	up	7.91166	8.11194	Detected	Detected
hsa-mir-29c-3p	1.14781	up	8.54715	8.74604	Detected	Detected
hsa-mir-30b-5p	1.14762	up	7.07833	7.27698	Detected	Detected
hsa-mir-7-5p	1.1448	up	0.765648	0.960744	Detected	Detected
hsa-mir-30e-5p	1.1422	up	6.08572	6.27753	Detected	Detected
hsa-let-7a-5p	1.13421	up	9.25431	9.436	Detected	Detected
hsa-mir-195-5p	1.12657	up	0.68389	0.855831	Detected	Detected
hsa-mir-660-5p	1.12105	up	4.01628	4.18113	Detected	Detected
hsa-mir-27b-3p	1.11954	up	3.39321	3.55612	Detected	Detected
hsa-mir-20b-5p	1.11314	up	5.70233	5.85697	Detected	Detected
hsa-let-7e-5p	1.10931	up	5.7189	5.86856	Detected	Detected
hsa-mir-132-3p	1.09884	up	4.4114	4.54739	Detected	Detected
hsa-mir-210	1.09792	up	3.91989	4.05466	Detected	Detected
hsa-mir-140-3p	1.08862	up	5.96321	6.08572	Detected	Detected
hsa-mir-26b-5p	1.08777	up	8.97068	9.09206	Detected	Detected
hsa-mir-320a	1.08765	up	4.26382	4.38504	Detected	Detected
hsa-miR-642a-3p	1.08749	up	5.12157	5.24258	Detected	Detected
hsa-mir-23a-3p	1.08596	up	8.03444	8.15341	Detected	Detected
hsa-mir-15a-5p	1.07987	up	7.71397	7.82482	Detected	Detected
hsa-mir-17-5p	1.07836	up	6.57208	6.68092	Detected	Detected
hsa-mir-93-5p	1.07817	up	4.86943	4.97802	Detected	Detected
hsa-mir-146a-5p	1.07665	up	6.97179	7.07833	Detected	Detected
hsa-mir-25-3p	1.07532	up	6.82187	6.92663	Detected	Detected
hsa-mir-1207-5p	1.07499	up	4.82334	4.92767	Detected	Detected
hsa-mir-30c-5p	1.06781	up	5.86856	5.96321	Detected	Detected
hsa-mir-107	1.06476	up	7.02455	7.11507	Detected	Detected
hsa-mir-1202	1.06157	up	4.97802	5.06422	Detected	Detected
hsa-mir-454-3p	1.05615	up	1.07028	1.14909	Detected	Detected
hsa-mir-1225-5p	1.05216	up	5.45116	5.52451	Detected	Detected
hsa-mir-769-5p	1.05017	up	0.599241	0.669861	Detected	Detected
hsa-mir-18b-5p	1.04944	up	0.669861	0.739474	Detected	Detected
hsa-mir-181a-5p	1.04942	up	6.50249	6.57208	Detected	Detected
hsa-mir-652-3p	1.04833	up	1.02803	1.09613	Detected	Detected
hsa-mir-18a-5p	1.04561	up	3.05374	3.11808	Detected	Detected
hsa-mir-1246	1.04474	up	5.85697	5.9201	Detected	Detected
hsa-miR-1268a	1.04371	up	4.52091	4.58263	Detected	Detected
hsa-mir-30e-3p	1.04292	up	3.08798	3.14861	Detected	Detected
hsa-mir-937-5p	1.0426	up	3.45745	3.51763	Detected	Detected
hsa-mir-324-3p	1.03554	up	5.13207	5.18245	Detected	Detected
hsa-mir-320c	1.0354	up	5.83968	5.88987	Detected	Detected
hsa-mir-19b-3p	1.03526	up	8.86736	8.91735	Detected	Detected
hsa-mir-185-5p	1.03525	up	4.09252	4.1425	Detected	Detected
hsa-mir-1275	1.03444	up	4.31401	4.36285	Detected	Detected
hsa-let-7d-5p	1.03179	up	6.92663	6.97179	Detected	Detected
hsa-mir-199a-3p	1.02481	up	0.515154	0.550512	Detected	Detected
hsa-mir-197-5p	1.01783	up	4.59856	4.62405	Detected	Detected
hsa-mir-342-5p	1.01157	up	6.14475	6.16135	Detected	Detected
hsa-mir-1290	-1		2.74368	2.74368	Detected	Detected
hsa-mir-150-5p	-1		11.8468	11.8468	Detected	Detected
hsa-mir-21-5p	-1		12.7916	12.7916	Detected	Detected
hsa-mir-27a-3p	-1		7.98679	7.98679	Detected	Detected
hsa-mir-30d-5p	-1		5.54221	5.54221	Detected	Detected
hsa-mir-320b	-1		5.66261	5.66261	Detected	Detected
hsa-mir-320d	-1		6.22125	6.22125	Detected	Detected
hsa-mir-483-5p	-1		0.562629	0.562629	Detected	Detected
hsa-mir-148b-3p	-1.00722	down	1.11384	1.10346	Detected	Detected
hsa-mir-595	-1.0101	down	0.978248	0.963755	Detected	Detected
hsa-mir-193b-3p	-1.01274	down	0.901084	0.882813	Detected	Detected
hsa-miR-103a-3p	-1.01557	down	7.5829	7.56062	Detected	Detected
hsa-mir-1973	-1.02953	down	0.725869	0.68389	Detected	Detected
hsa-let-7i-5p	-1.03526	down	8.91735	8.86736	Detected	Detected
hsa-mir-486-5p	-1.03601	down	2.81629	2.76526	Detected	Detected
hsa-let-7b-5p	-1.04366	down	7.69156	7.62991	Detected	Detected
hsa-mir-361-5p	-1.04639	down	4.0817	4.01628	Detected	Detected
hsa-mir-26a-5p	-1.04653	down	7.75718	7.69156	Detected	Detected
hsa-mir-342-3p	-1.0475	down	9.32127	9.25431	Detected	Detected
hsa-mir-374b-5p	-1.07656	down	4.1425	4.03607	Detected	Detected
hsa-mir-24-3p	-1.07987	down	7.82482	7.71397	Detected	Detected
hsa-mir-92a-3p	-1.08009	down	6.73169	6.62054	Detected	Detected
hsa-miR-365a-3p	-1.08105	down	3.16617	3.05374	Detected	Detected
hsa-mir-324-5p	-1.08726	down	2.78024	2.65954	Detected	Detected
hsa-mir-22-3p	-1.08861	down	7.56062	7.43813	Detected	Detected
hsa-mir-29c-5p	-1.09639	down	0.706629	0.573875	Detected	Detected
hsa-mir-188-5p	-1.11436	down	0.797833	0.641618	Detected	Detected
hsa-mir-125b-5p	-1.11492	down	0.882813	0.725869	Detected	Detected
hsa-mir-99b-5p	-1.12307	down	2.86467	2.69723	Detected	Detected
hsa-mir-211-3p	-1.12349	down	1.19602	1.02803	Detected	Detected
hsa-mir-1229-5p	-1.18038	down	3.63246	3.39321	Detected	Detected
hsa-miR-664a-3p	-1.19342	down	1.16884	0.913735	Detected	Detected
hsa-mir-532-3p	-1.19465	down	0.855831	0.599241	Detected	Detected
hsa-mir-1915-3p	-1.20163	down	5.37449	5.1095	Detected	Detected
hsa-mir-513a-5p	-1.20869	down	1.1427	0.86926	Detected	Detected
hsa-mir-340-3p	-1.2096	down	0.539452	0.264916	Detected	Detected
hsa-mir-1234-5p	-1.22493	down	6.62054	6.32784	Detected	Detected
hsa-mir-874	-1.2419	down	0.611578	0.29903	Detected	Detected
hsa-miR-378a-3p	-1.25181	down	6.46877	6.14475	Detected	Detected
hsa-mir-505-3p	-1.26593	down	0.530565	0.190363	Detected	Detected
hsa-mir-638	-1.28418	down	4.83894	4.4781	Detected	Detected
hsa-mir-502-3p	-1.30304	down	0.583069	0.201193	Detected	Detected
hsa-mir-125a-5p	-1.35306	down	4.50755	4.07133	Detected	Detected
hsa-mir-939-5p	-1.35963	down	3.5312	3.08798	Detected	Detected
hsa-mir-574-5p	-1.36543	down	5.19917	4.74981	Detected	Detected
hsa-mir-940	-1.44717	down	3.98406	3.45082	Detected	Detected
hsa-mir-574-3p	-1.46273	down	1.07923	0.530565	Detected	Detected
hsa-mir-197-3p	-1.5328	down	4.92767	4.3115	Detected	Detected
hsa-miR-1260a	-1.5861	down	8.69992	8.03444	Detected	Detected
hsa-mir-1228-3p	-1.75492	down	0.771251	-0.0401574	Detected	Detected
hsa-mir-630	-1.79712	down	5.1095	4.26382	Detected	Detected
hsa-mir-423-5p	-2.55305	down	2.4225	1.07028	Detected	Detected
hsa-mir-31-3p	-2.67511	down	2.46282	1.04322	Detected	Detected
hsa-mir-135a-3p	-2.72811	down	-0.0401574	-1.48806	Detected	Detected
hsa-mir-141-3p	-2.8038	down	0.139581	-1.3478	Detected	Detected
hsa-mir-1305	-2.85358	down	2.68161	1.16884	Detected	Detected
hsa-mir-873-5p	-2.90547	down	-0.178242	-1.71701	Detected	Detected
hsa-mir-99a-5p	-3.02141	down	0.232409	-1.36281	Detected	Detected
hsa-miR-663a	-3.16431	down	0.247253	-1.41464	Detected	Detected
hsa-mir-95	-3.22436	down	0.38591	-1.3031	Detected	Detected
hsa-mir-196b-5p	-3.26484	down	0.19495	-1.51206	Detected	Detected
hsa-mir-132-5p	-3.27745	down	0.359369	-1.35321	Detected	Detected
hsa-miR-500a-3p	-3.3027	down	0.419953	-1.30369	Detected	Detected
hsa-mir-598	-3.34019	down	0.29903	-1.4409	Detected	Detected
hsa-mir-572	-3.44964	down	0.220558	-1.56589	Detected	Detected
hsa-mir-199b-5p	-3.53366	down	0.272475	-1.54869	Detected	Detected
hsa-mir-484	-3.60413	down	0.550512	-1.29914	Detected	Detected
hsa-mir-1281	-3.6864	down	0.190363	-1.69185	Detected	Detected
hsa-mir-32-3p	-3.70592	down	2.76526	0.875429	Detected	Detected
hsa-mir-1234-3p	-3.72519	down	0.332053	-1.56526	Detected	Detected
hsa-mir-766-3p	-3.83833	down	3.12644	1.18596	Detected	Detected
hsa-mir-221-3p	-3.8884	down	2.96467	1.0055	Detected	Detected
hsa-miR-371a-5p	-8.83773	down	-0.178242	-3.32192	Detected	Not Detected
hsa-mir-33b-3p	-12.9891	down	0.377306	-3.32192	Detected	Not Detected
hsa-mir-498	-15.0803	down	0.592674	-3.32192	Detected	Not Detected
	Note：
		Up-reulated
		Down-regulated
		No change
