# Supplementary material for: Dendritic Cell-Associated miRNAs Are Modulated via Chromatin Remodeling in Response to Different Environments
Source: PLoS One. 2014 Apr 3;9(4):e90231. doi: 10.1371/journal.pone.0090231 (PMC3974670; doi:10.1371/journal.pone.0090231)
Supplement: Table S5 — LPS and TGF-βupregulated miRNAs with H3K4me3 redistribution. (XLS) [file pone.0090231.s008.xls]

## Sheet: Distribution-H3K4-LPS
LPS upregulated miRNAs	H3K4me3-Control	H3K4me3-LPS	LPS-Redistribution
hsa-mir-144-3p	2	1	0
hsa-mir-34b-5p	0	0	0
hsa-mir-1233-1-5p	2	1	0
hsa-miR-1233-1-5p	2	1	0
hsa-mir-9-3p	1	1	+
hsa-mir-9-3p	0	0	0
hsa-mir-9-3p	0	0	0
hsa-mir-1181	2	1	+
hsa-mir-134	0	0	0
hsa-mir-1914-3p	0	0	0
hsa-mir-1306-3p	2	1	0
hsa-mir-582-5p	0	0	0
hsa-mir-301a-3p	2	1	0
hsa-mir-98-5p	2	1	+
hsa-mir-551b-3p	0	0	0
hsa-mir-125a-3p	2	1	+
hsa-mir-155-3p	2	1	+
hsa-mir-193a-3p	2	1	0
hsa-mir-221-5p	1	1	+
hsa-mir-215	2	1	0
hsa-mir-532-5p	2	1	0
hsa-miR-151a-3p	2	1	0
hsa-mir-1228-5p	0	0	0
hsa-mir-194-5p	2	1	0
hsa-mir-194-5p	2	1	0
hsa-mir-181a-3p	1	1	+
hsa-mir-181a-3p	2	1	+
hsa-mir-17-3p	2	1	0
hsa-mir-362-5p	2	1	0
hsa-mir-885-3p	0	0	0
hsa-mir-330-3p	2	1	0
hsa-mir-200c-3p	2	1	0
hsa-mir-1180	2	1	0
hsa-mir-30a-5p	1	0	0
hsa-mir-144-5p	2	1	0
hsa-mir-502-5p	2	1	0
hsa-mir-181c-3p	2	1	0
hsa-miR-664a-5p	2	1	0
hsa-mir-181c-5p	2	1	0
hsa-mir-200b-3p	0	0	0
hsa-mir-100-5p	0	0	0
hsa-mir-449a	2	1	+
hsa-miR-378a-5p	2	1	0
hsa-mir-30b-3p	2	1	0
hsa-mir-1271-5p	1	0	0
hsa-mir-487b	0	0	0
hsa-mir-206	0	0	0
hsa-mir-424-3p	2	0	0
hsa-mir-520f	0	0	0
hsa-mir-362-3p	2	1	0
hsa-mir-486-3p	0	0	0
hsa-miR-500a-5p	2	1	0
hsa-mir-627	2	1	0
hsa-mir-629-3p	2	1	0
hsa-mir-223-5p	2	1	+
hsa-mir-29a-5p	2	1	0
hsa-mir-142-3p	2	1	0
hsa-mir-301b	2	1	0
hsa-mir-126-3p	0	0	0
hsa-mir-29b-3p	2	1	0
hsa-mir-29b-3p	2	1	0
hsa-mir-142-5p	2	1	0
hsa-mir-625-5p	2	1	+
hsa-mir-155-5p	2	1	+
hsa-mir-101-3p	2	1	+
hsa-mir-101-3p	2	1	0
hsa-mir-340-5p	2	1	0
hsa-mir-494	0	0	0
hsa-mir-130a-3p	1	1	+
hsa-mir-338-3p	0	0	0
hsa-mir-192-5p	2	1	0
hsa-mir-590-5p	2	1	0
hsa-mir-28-5p	2	1	0
hsa-mir-16-5p	2	1	+
hsa-mir-16-5p	2	0	0
hsa-mir-361-3p	1	0	0
hsa-mir-29a-3p	2	1	0
hsa-mir-148a-3p	2	1	+
hsa-mir-32-5p	1	1	+
hsa-mir-20a-3p	2	1	0
hsa-mir-505-5p	2	1	0
hsa-mir-374a-5p	2	1	0
hsa-mir-10a-5p	0	0	0
hsa-mir-150-3p	1	1	+
hsa-mir-140-5p	0	0	0
hsa-mir-23b-3p	2	1	0
hsa-miR-451a	2	1	0
hsa-mir-19a-3p	2	1	0
hsa-mir-15b-5p	2	1	+
hsa-mir-33a-5p	2	1	0
hsa-miR-151a-5p	2	1	0
hsa-mir-106b-5p	2	1	0
hsa-mir-21-3p	2	1	+
hsa-let-7c	1	0	0
hsa-mir-222-3p	1	1	+
hsa-mir-212-3p	0	0	0
hsa-mir-425-5p	2	1	0
hsa-mir-31-5p	0	0	0
hsa-let-7g-5p	2	1	0
hsa-mir-128	2	1	0
hsa-mir-128	0	0	0
hsa-mir-34a-5p	1	1	+
hsa-mir-130b-3p	2	1	0
hsa-mir-186-5p	2	1	0
hsa-mir-424-5p	2	0	0
hsa-mir-181d	2	1	0
hsa-mir-205-3p	0	0	0
hsa-mir-20a-5p	2	1	0
hsa-let-7f-5p	0	0	0
hsa-let-7f-5p	0	0	0
hsa-mir-363-3p	1	0	0
hsa-mir-181b-5p	2	0	0
hsa-mir-181b-5p	2	1	0
hsa-mir-331-3p	0	0	0
hsa-mir-223-3p	2	1	+
hsa-mir-575	2	1	+
hsa-mir-146b-5p	2	1	0
hsa-mir-29c-3p	2	1	0
hsa-mir-30b-5p	2	1	0
hsa-mir-7-5p	2	1	0
hsa-mir-7-5p	0	0	0
hsa-mir-7-5p	0	0	0
hsa-mir-30e-5p	2	1	0
hsa-let-7a-5p	0	0	0
hsa-let-7a-5p	0	0	0
hsa-let-7a-5p	0	0	0
hsa-mir-195-5p	0	0	0
hsa-mir-660-5p	2	1	0
hsa-mir-27b-3p	2	1	0
hsa-mir-20b-5p	2	0	0
hsa-let-7e-5p	2	1	+
hsa-mir-132-3p	0	0	0
hsa-mir-210	2	1	+
hsa-mir-140-3p	0	0	0
hsa-mir-26b-5p	2	1	0
hsa-mir-320a	2	1	0
hsa-miR-642a-3p	2	1	0
hsa-mir-23a-3p	2	1	0
hsa-mir-15a-5p	2	0	0
hsa-mir-17-5p	2	1	0
hsa-mir-93-5p	2	1	0
hsa-mir-146a-5p	2	1	+
hsa-mir-25-3p	2	1	0
hsa-mir-1207-5p	0	0	0
hsa-mir-30c-5p	2	1	0
hsa-mir-30c-5p	1	0	0
hsa-mir-107	2	1	0
hsa-mir-1202	0	0	0
hsa-mir-454-3p	2	1	0
hsa-mir-1225-5p	0	0	0
hsa-mir-769-5p	2	1	0
hsa-mir-18b-5p	2	0	0
hsa-mir-181a-5p	1	1	+
hsa-mir-181a-5p	2	1	+
hsa-mir-652-3p	2	0	0
hsa-mir-18a-5p	2	1	0
hsa-mir-1246	0	0	0
hsa-miR-1268a	0	0	0
hsa-mir-30e-3p	2	1	0
hsa-mir-937-5p	1	1	0
hsa-mir-324-3p	2	1	0
hsa-mir-320c	0	0	0
hsa-mir-320c	0	0	0
hsa-mir-19b-3p	2	1	0
hsa-mir-19b-3p	1	0	0
hsa-mir-185-5p	2	1	0
hsa-mir-1275	0	0	0
hsa-let-7d-5p	0	0	0
hsa-mir-199a-3p	0	0	0
hsa-mir-199a-3p	2	1	0
hsa-mir-197-5p	0	0	0
hsa-mir-342-5p	2	1	0
	Note:
	2, high
	1, low
	0, no

## Sheet: Distribution-H3K4-TGFb
TGF-β up-regulated miRNAs	H3K4-Control	H3K4-TGFb	TGFb-Redistribution
hsa-mir-766-3p	2	2	+
hsa-mir-574-3p	2	2	0
hsa-mir-1281	2	2	0
hsa-mir-574-5p	2	2	0
hsa-mir-454-3p	2	2	0
hsa-mir-301a-3p	2	2	0
hsa-mir-98-5p	2	2	0
hsa-mir-940	2	2	0
hsa-mir-630	2	2	0
hsa-mir-142-5p	2	2	0
hsa-mir-1234-5p	2	2	0
hsa-mir-1915-3p	2	2	0
hsa-mir-29b-3p	2	2	0
hsa-mir-29b-3p	2	2	0
hsa-mir-638	2	2	0
hsa-mir-142-3p	2	2	0
hsa-mir-423-5p	2	2	0
hsa-mir-27a-3p	2	2	0
hsa-mir-32-3p	1	1	0
hsa-mir-1229-5p	1	1	0
hsa-mir-937-5p	1	1	0
hsa-mir-22-3p	1	1	0
hsa-mir-885-3p	0	0	0
hsa-mir-595	0	0	0
hsa-mir-205-3p	0	0	0
hsa-mir-498	0	0	0
hsa-mir-1228-3p	0	0	0
hsa-mir-140-5p	0	0	0
hsa-mir-197-3p	0	0	0
hsa-miR-1260a	0	0	0
hsa-mir-1207-5p	0	0	0
hsa-mir-1225-5p	0	0	0
hsa-mir-320c	0	0	0
hsa-mir-320c	0	0	0
	Note:
	2, high
	1, low
	0, no
